# Supplementary material
Source: PubMed Central journal article supplement (PMC3460691)
Supplement: NIHMS407509-supplement-1_si_001.pdf [file NIHMS407509-supplement-1_si_001.pdf]

# Origins of Stereoselectivities of Dihydroxylations of *cis*-Bicyclo[3.3.0]octenes

Hao Wang,<sup>a</sup> Philipp Kohler,<sup>b</sup> Larry E. Overman<sup>b\*</sup> and K. N. Houk<sup>a\*</sup>

<sup>a</sup> *Department of Chemistry and Biochemistry, University of California, Los Angeles, California 90095-1569, and*

<sup>b</sup> *Department of Chemistry, 1102 Natural Sciences II, University of California, Irvine, California 92697-2025*

## Supporting Information – Table of Contents

|                                                                                                                                                      |     |
|------------------------------------------------------------------------------------------------------------------------------------------------------|-----|
| <b>A. Experimental procedures:</b> .....                                                                                                             | S2  |
| <b>B. Computational Data:</b> .....                                                                                                                  | S15 |
| 1. Cartesian coordinates of stationary points: <b>TS3<math>\beta</math></b> , <b>TS3<math>\alpha</math></b> .....                                    | S15 |
| 2. Optimized structures and energies of <b>compound 3</b> .....                                                                                      | S22 |
| 3. Cartesian coordinates of stationary points: <b>R9</b> , <b>R11</b> , <b>R11'</b> , <b>R13</b> , <b>R13'</b> .....                                 | S26 |
| 4. Cartesian coordinates of stationary points: <b>TS9<math>\beta</math></b> , <b>TS11<math>\beta</math></b> , <b>TS13<math>\beta</math></b> .....    | S29 |
| 5. Cartesian coordinates of stationary points: <b>TS9<math>\alpha</math></b> , <b>TS11<math>\alpha</math></b> , <b>TS13<math>\alpha</math></b> ..... | S31 |
| <b>C. Literature Search:</b> .....                                                                                                                   | S33 |

### Full reference 7:

Gaussian 09, Revision B.01, M. J. Frisch, G. W. Trucks, H. B. Schlegel, G. E. Scuseria, M. A. Robb, J. R. Cheeseman, G. Scalmani, V. Barone, B. Mennucci, G. A. Petersson, H. Nakatsuji, M. Caricato, X. Li, H. P. Hratchian, A. F. Izmaylov, J. Bloino, G. Zheng, J. L. Sonnenberg, M. Hada, M. Ehara, K. Toyota, R. Fukuda, J. Hasegawa, M. Ishida, T. Nakajima, Y. Honda, O. Kitao, H. Nakai, T. Vreven, J. A. Montgomery, Jr., J. E. Peralta, F. Ogliaro, M. Bearpark, J. J. Heyd, E. Brothers, K. N. Kudin, V. N. Staroverov, R. Kobayashi, J. Normand, K. Raghavachari, A. Rendell, J. C. Burant, S. S. Iyengar, J. Tomasi, M. Cossi, N. Rega, J. M. Millam, M. Klene, J. E. Knox, J. B. Cross, V. Bakken, C. Adamo, J. Jaramillo, R. Gomperts, R. E. Stratmann, O. Yazyev, A. J. Austin, R. Cammi, C. Pomelli, J. W. Ochterski, R. L. Martin, K. Morokuma, V. G. Zakrzewski, G. A. Voth, P. Salvador, J. J. Dannenberg, S. Dapprich, A. D. Daniels, O. Farkas, J. B. Foresman, J. V. Ortiz, J. Cioslowski, and D. J. Fox, Gaussian, Inc., Wallingford CT, 2010.

## A. Experimental Procedures

### Chemical Materials and Methods

Unless stated otherwise, reactions were conducted in oven-dried glassware under an atmosphere of nitrogen or argon using anhydrous solvents (either freshly distilled or passed through activated alumina columns). All other commercially obtained reagents were used as received. Reaction temperatures were controlled using an IKA Mag temperature modulator. Thin-layer chromatography (TLC) was conducted with E. Merck silica gel 60 F254 pre-coated plates, (0.25 mm) and visualized by exposure to UV light (254 nm) or stained with anisaldehyde, ceric ammonium molybdate, potassium permanganate and iodine. Flash column chromatography (CC) was performed using normal phase silica gel (60 Å, 230–240 mesh, Merck KGA).  $^1\text{H}$  NMR spectra were recorded on Bruker spectrometers (at 500 or 600 MHz) and are reported relative to deuterated solvent signals. Data for  $^1\text{H}$  NMR spectra are reported as follows: chemical shift ( $\delta$  ppm), multiplicity, coupling constant (Hz) and integration.  $^{13}\text{C}$  NMR spectra were recorded on Bruker Spectrometers (at 125 MHz). Data for  $^{13}\text{C}$  NMR spectra are reported in terms of chemical shift. IR spectra were recorded on a Varian 640-IR spectrometer and are reported in terms of frequency of absorption ( $\text{cm}^{-1}$ ). High resolution mass spectra were obtained from the UC Irvine Mass Spectrometry Facility with a Micromass LCT spectrometer. See *JOC Standard Abbreviations and Acronyms* for abbreviations (available at [http://pubs.acs.org/userimages/ContentEditor/1218717864819/jocean\\_abbreviations.pdf](http://pubs.acs.org/userimages/ContentEditor/1218717864819/jocean_abbreviations.pdf)).

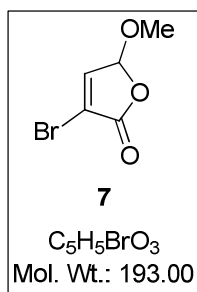

**3-Bromo-5-methoxyfuran-2(5H)-one (7)<sup>1</sup>:** Compound **7** was prepared as follows: To a solution of 5-methoxyfuran-2(5H)-one<sup>2</sup> (413 mg, 3.62 mmol) in PhH (3 mL) at 0 °C, bromine (0.19 mL, 3.7 mmol) in PhH (3 mL) was added and the mixture stirred at 0 °C for 5 h. Pyridine (0.31 mL, 3.9 mmol) was added and the mixture kept at 0 °C for 30 min. The resulting yellow suspension was filtered, rinsed with PhH, and the filtrate concentrated. Purification of the residue by CC ( $\text{SiO}_2$ ; hexanes/EtOAc 75:25) afforded **7** (591 mg, 85%) as a pale yellow oil.  $^1\text{H}$  NMR ( $\text{CDCl}_3$ , 600 MHz)  $\delta$  7.28 (dd,  $J = 1.4, 0.8$  Hz, 1H), 5.80 (dd,  $J = 1.4, 0.8$  Hz, 1H), 3.56 (d,  $J = 0.9$  Hz, 3H).

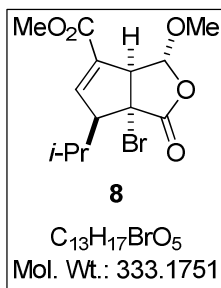

**(±)-(3R,3aS,6S,6aR)-Methyl 6a-bromo-6-isopropyl-3-methoxy-1-oxo-3,3a,6,6a-tetrahydro-1H-cyclopenta[c]furan-4-carboxylate (8):** Compound **6**<sup>3</sup> (1.46 g, 10.4 mmol) and  $Ph_3P$  (2.73 g, 10.4 mmol) were added to a solution of **7** (1.00 g, 5.20 mmol) in PhH (21 mL). The initially orange mixture was stirred at rt for 45 min, during which time it turned dark brown, and was concentrated. Purification of the residue by CC ( $SiO_2$ ; hexanes/EtOAc 95:5  $\rightarrow$  60:40) gave **8** (397 mg, 23%) as a pale yellow oil.  $^1H$  NMR ( $CDCl_3$ , 500 MHz)  $\delta$  6.84 (t,  $J = 1.7$  Hz, 1H), 5.45 (s, 1H), 4.02 (s, 1H), 3.81 (s, 3H), 3.58 (s, 3H), 3.37 (dt,  $J = 6.6, 1.8$  Hz, 1H), 2.34 (oct,  $J = 6.7$  Hz, 1H), 1.27 (d,  $J = 6.7$  Hz, 3H), 0.89 (d,  $J = 6.6$  Hz, 3H);  $^{13}C$  NMR ( $CDCl_3$ , 125 MHz)  $\delta$  172.2, 163.3, 146.0, 131.5, 105.2, 66.8, 64.1, 57.6, 53.5, 52.3, 27.5, 23.5, 20.6; IR (film) 2960, 2873, 1787, 1718, 1639, 1439, 1353, 1272, 1248, 1223, 1174, 1111, 1033, 946  $cm^{-1}$ ; HRMS (ESI) calculated for  $C_{13}H_{17}O_5^{79}Br$  (M+Na) 355.0157, observed 355.0149, calculated for  $C_{13}H_{17}O_5^{81}Br$  (M+Na) 357.0138, observed 357.0128.

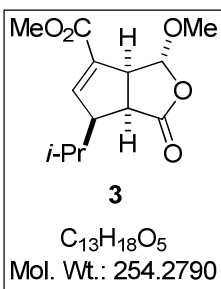

**(±)-(3R,3aS,6S,6aS)-Methyl 6-isopropyl-3-methoxy-1-oxo-3,3a,6,6a-tetrahydro-1H-cyclopenta[c]furan-4-carboxylate (3):** To a solution of **8** (354 mg, 1.06 mmol) in AcOH (10 mL), Zn dust (1.42 g, 21.7 mmol) was added and the mixture stirred at rt for 2 h. Filtration through a plug of Celite (rinse with  $Et_2O$ ) and purification of the residue by CC ( $SiO_2$ ; hexanes/EtOAc 92:8  $\rightarrow$  50:50) yielded **3** (238 mg, 88%) as a colorless oil.  $^1H$  NMR ( $CDCl_3$ , 500 MHz)  $\delta$  6.92 (t,  $J = 1.8$  Hz, 1H), 5.45 (s, 1H), 3.78 (s, 3H), 3.63 (dt,  $J = 7.4, 2.5$  Hz, 1H), 3.51 (s, 3H), 3.38 (t,  $J = 8.0$  Hz, 1H), 2.81 (tt,  $J = 8.8, 2.3$  Hz, 1H), 2.23–2.13 (m, 1H), 1.16 (d,  $J = 6.4$  Hz, 3H), 0.98 (d,  $J = 6.6$  Hz, 3H);  $^{13}C$  NMR ( $CDCl_3$ , 125 MHz)  $\delta$  175.7, 164.3, 148.2, 132.7, 104.8, 56.8, 56.1, 53.5, 52.0, 42.9, 27.2, 23.2, 21.4; IR (film) 2959, 2871, 1779, 1717, 1631, 1439, 1352, 1275, 1198, 1154, 1108, 953  $cm^{-1}$ ; HRMS (ESI) calculated for  $C_{13}H_{18}O_5$  (M+Na) 277.1052, observed 277.1056.

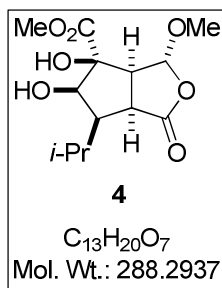

(±)-(3*R*,3*aS*,4*S*,5*R*,6*R*,6*aS*)-Methyl 4,5-dihydroxy-6-isopropyl-3-methoxy-1-oxohexahydro-1*H*-cyclopenta[*c*]furan-4-carboxylate (**4**): To a solution of **3** (60 mg, 0.24 mmol) in 1:1 *t*-BuOH/H<sub>2</sub>O (2.4 mL), NMO (65 mg, 0.48 mmol), and OsO<sub>4</sub> (0.15 mL, 0.012 mmol; 2.5 wt% in *t*BuOH) were added. After stirring at rt for 90 min, the mixture was filtered through a plug of SiO<sub>2</sub> (rinsed with Et<sub>2</sub>O) and concentrated. Purification of the

residue by CC (SiO<sub>2</sub>; hexanes/EtOAc 75:25 → 50:50) provided a 92:8 mixture of **4** and **5** (59 mg, 87%) as a colorless solid. An analytical sample of **4** was obtained by recrystallization from CH<sub>2</sub>Cl<sub>2</sub>. Data for **4**: mp 146–147 °C; <sup>1</sup>H NMR (CDCl<sub>3</sub>, 500 MHz) δ 5.53 (s, 1H), 3.88 (s, 3H), 3.83 (d, *J* = 3.1 Hz, 1H), 3.77 (s, 1H), 3.46 (s, 3H), 3.23 (t, *J* = 8.4 Hz, 1H), 3.04 (d, *J* = 8.8 Hz, 1H), 2.70 (s, 1H), 2.47–2.37 (m, 1H), 2.06 (br t, *J* = 9.6 Hz, 1H), 1.15 (d, *J* = 6.5 Hz, 3H), 0.99 (d, *J* = 6.6 Hz, 3H); <sup>13</sup>C NMR (CDCl<sub>3</sub>, 125 MHz) δ 176.1, 174.8, 103.0, 81.1, 76.3, 56.8, 54.2, 53.6, 51.9, 43.8, 23.9, 22.2, 21.7; IR (film) 3466 (br), 2961, 2917, 2871, 1736 (br), 1439, 1360, 1256, 1178, 1113, 1008, 953 cm<sup>-1</sup>; HRMS (ESI) calculated for C<sub>13</sub>H<sub>20</sub>O<sub>7</sub> (M+Na) 311.1107, observed 311.1116. A crystal suitable for X-ray structure elucidation was grown by slow evaporation of an EtOAc solution (colorless needle).

#### NMR Table for 4

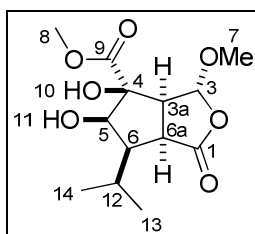

**Table S1.** <sup>1</sup>H (500 MHz), <sup>13</sup>C (125 MHz), HMBC, COSY, and NOESY NMR data for **4**, CDCl<sub>3</sub>.

| atom | <sup>13</sup> C<br>(mult) | <sup>1</sup> H mult, <i>J</i> (Hz) | HMBC <sup>a</sup> | COSY <sup>b</sup> | NOESY <sup>b</sup>                                                      |
|------|---------------------------|------------------------------------|-------------------|-------------------|-------------------------------------------------------------------------|
| 1    | 176.1 (C)                 |                                    |                   |                   |                                                                         |
| 3    | 103.0<br>(CH)             | 5.53 (s, 1H)                       | 1, 4, 6a, 7       | 3a                | 3a <sup>c</sup> , 7 <sup>c</sup> , 10 <sup>c</sup> ,<br>11 <sup>c</sup> |

|    |                            |                          |                 |                  |                                                                         |
|----|----------------------------|--------------------------|-----------------|------------------|-------------------------------------------------------------------------|
| 3a | 51.9<br>(CH)               | 3.04 (d, 8.8, 1H)        | 1, 3, 4, 5, 9   | 3, 6a            | 3, 6a                                                                   |
| 4  | 81.1 (C)                   |                          |                 |                  |                                                                         |
| 5  | 76.3<br>(CH)               | 3.83 (d, 3.1, 1H)        | 3a, 4, 6, 6a, 9 | 6, 11            | 6, 11, 14                                                               |
| 6  | 53.6<br>(CH)               | 2.06 (br. t, 9.6,<br>1H) |                 | 5, 6a, 11,<br>12 | 5 <sup>c</sup> , 6a <sup>c</sup> , 13 <sup>c</sup> ,<br>14 <sup>c</sup> |
| 6a | 43.8<br>(CH)               | 3.23 (t, 8.4, 1H)        | 1, 4, 5, 6      | 3a, 6            | 3a, 6, 13                                                               |
| 7  | 56.8<br>(CH <sub>3</sub> ) | 3.46 (s, 3H)             | 3               |                  | 3                                                                       |
| 8  | 54.2<br>(CH <sub>3</sub> ) | 3.88 (s, 3H)             | 4, 9            |                  |                                                                         |
| 9  | 174.8 (C)                  |                          |                 |                  |                                                                         |
| 10 |                            | 3.77 (s, 1H)             | 3a, 4, 5, 9     |                  | 3, 11                                                                   |
| 11 |                            | 2.70 (s, 1H)             | 4, 5, 6         | 5, 6             | 3, 5, 10                                                                |
| 12 | 23.9<br>(CH)               | 2.47–2.37 (m,<br>1H)     |                 | 6, 13, 14        | 13, 14                                                                  |
| 13 | 22.2<br>(CH <sub>3</sub> ) | 1.15 (d, 6.5, 3H)        | 6, 12, 14       | 12, 14           | 6, 6a, 12, 14                                                           |
| 14 | 21.7<br>(CH <sub>3</sub> ) | 0.99 (d, 6.6, 3H)        | 6, 12, 13       | 12, 13           | 6, 12, 13                                                               |

<sup>a</sup>Carbons that correlate to the proton resonance. Optimized for 10 Hz coupling.

<sup>b</sup>Protons that correlate to the proton resonance. <sup>c</sup>1-D NOE observed by irradiation with 2 second delay.

# Single-Crystal X-ray Structure of 4<sup>5</sup>

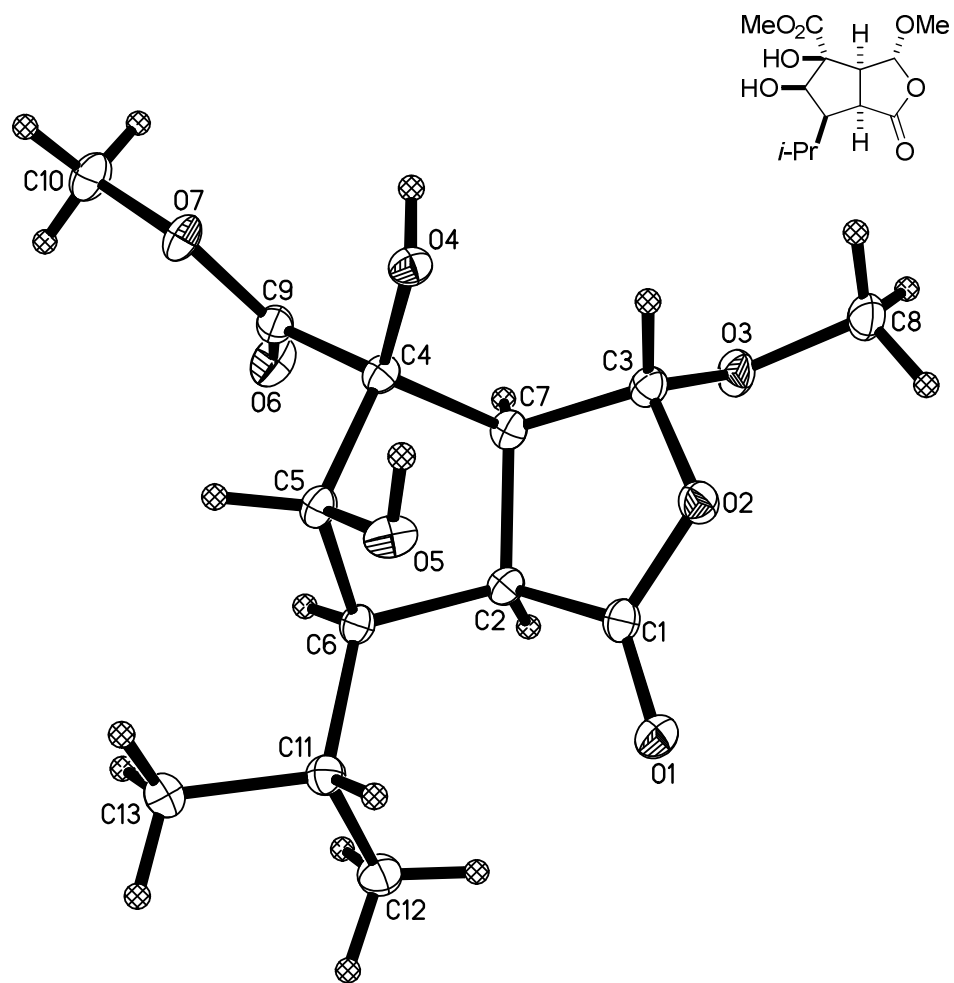

# Single-Crystal Structure of the Benzyl Ester Analogue of 3<sup>5</sup>

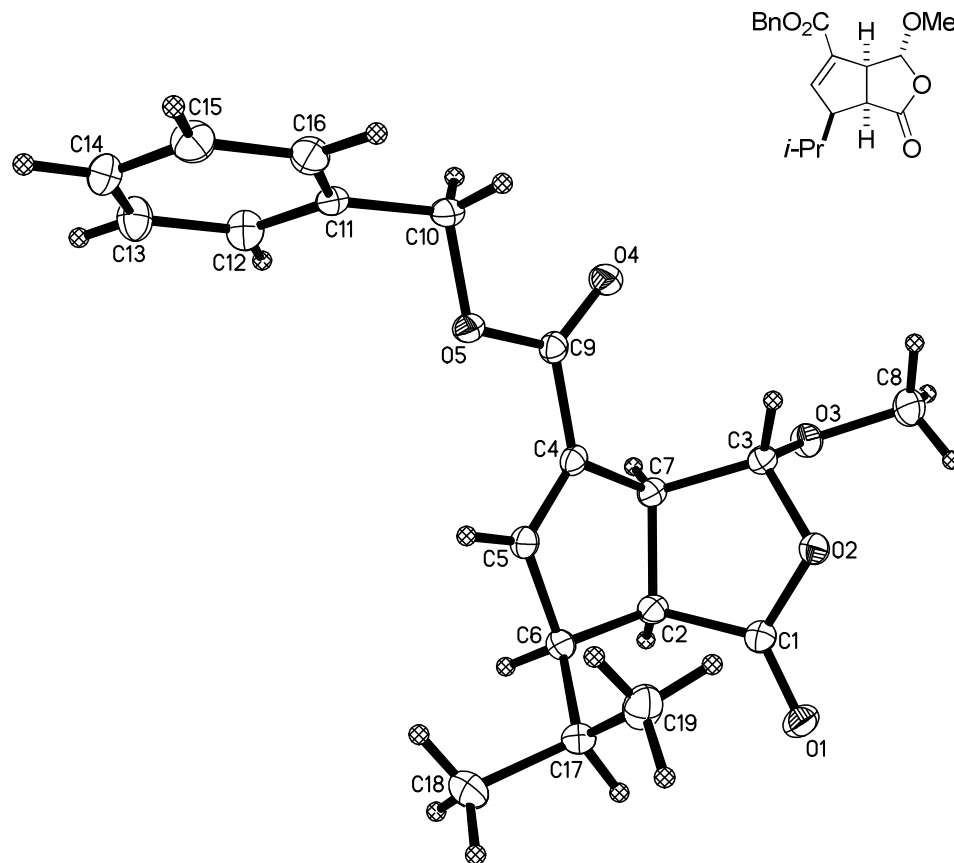

Current Data Parameters  
 QNAME: 1313\_2  
 NAME: 1313\_2  
 PROCNO: 1  
 P2: Acquisition Parameters  
 Time: 14.24  
 PROCNH: 2  
 PROCNU: 2  
 TD: 65536  
 SOLVENT: CDCl3  
 NS: 815  
 DS: 2  
 FIDRES: 0.098178 Hz  
 AQ: 5.199999 sec  
 RG: 257  
 DI: 0.000000 sec  
 DE: 5.000000 sec  
 TE: 300.2 K  
 DT: 0.1000000 sec  
 TD0: 1  
 HSI: CHANNEL f1  
 P1: 8.00 MHz  
 P2: 8.00 MHz  
 RF1: 600.1342009 MHz  
 RF2: 600.1342009 MHz  
 P2 Processing parameters  
 SF: 600.1342009 MHz  
 Ww: 0  
 SFO: 0  
 GB: 0.20 Hz  
 PC: 1.00

1H spectrum

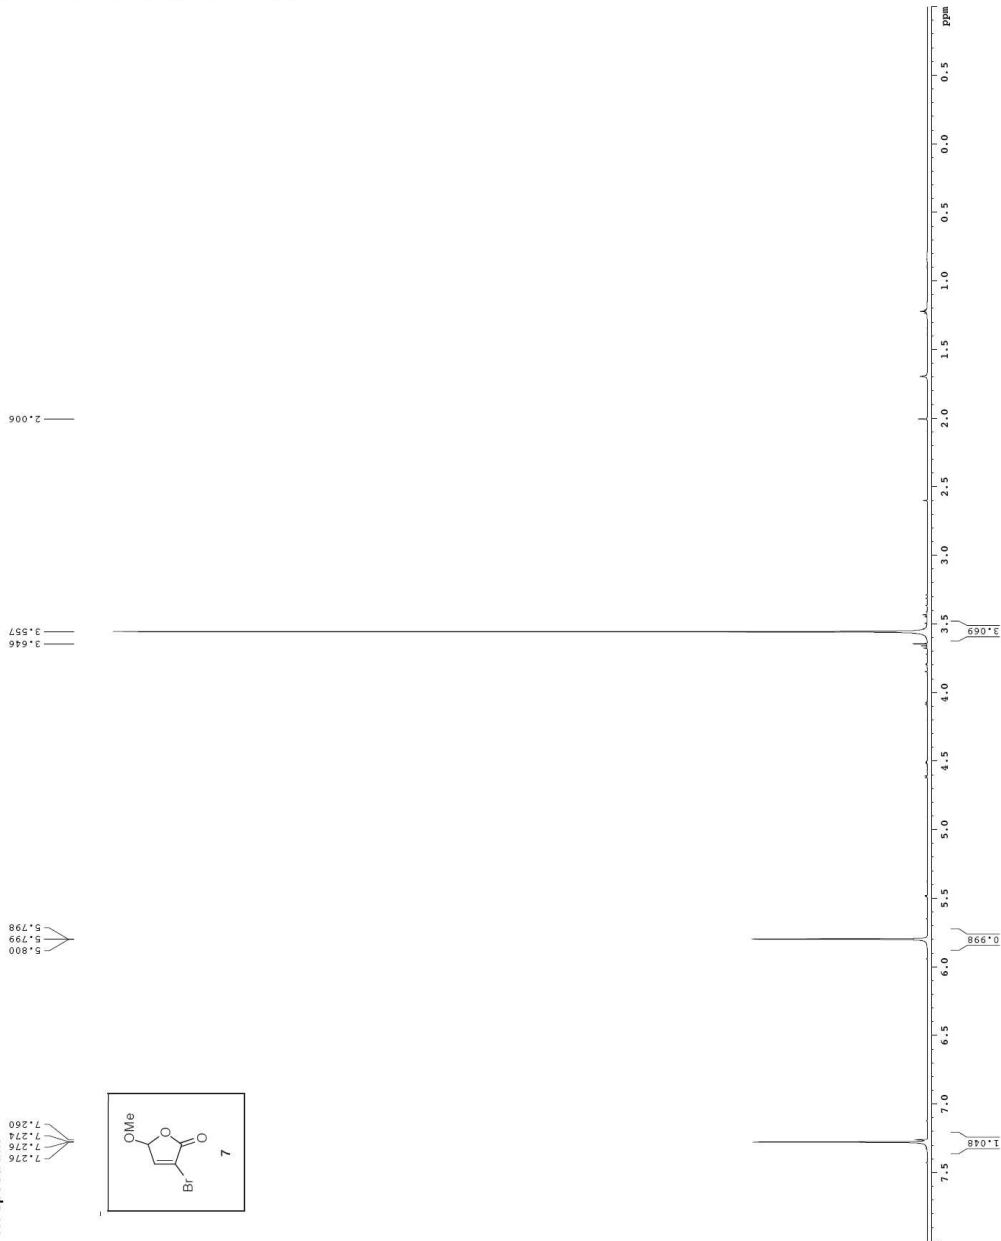



1H spectrum

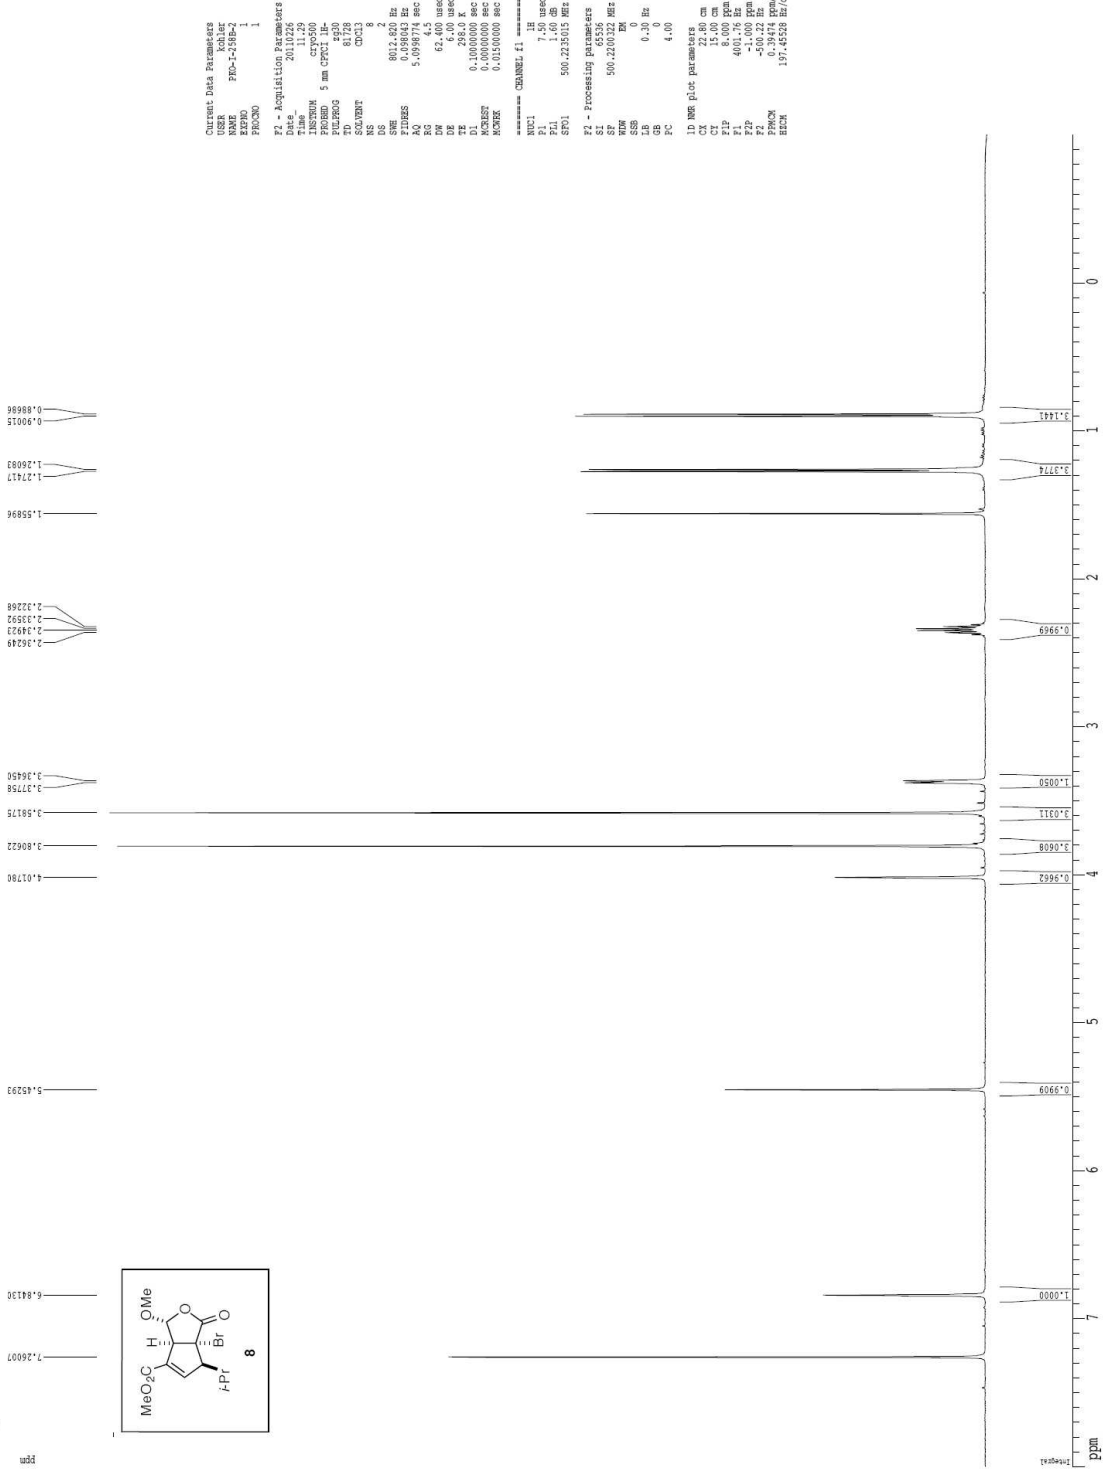

Current Data Parameters  
 Date\_ 20110226  
 TIME\_ 11:05:00  
 NAME\_ FID-218842  
 EXPNO\_ 1  
 PROCNO\_ 1  
 F2 - Acquisition Parameters  
 Date\_ 20110226  
 Time\_ 11:05:00  
 INSTRUM\_ czi500  
 PROBHD\_ 5 mm CPCL H-  
 PULPROG\_ zgpg30  
 SOLVENT\_ CDCl3  
 NS\_ 8  
 DS\_ 4  
 SWH\_ 802.800 Hz  
 FIDRES\_ 0.098643 Hz  
 AQ\_ 5.0989774 sec  
 DQ\_ 62.400 usec  
 DE\_ 6.00 usec  
 TE\_ 300.2 K  
 DT\_ 0.10000000 sec  
 ACQRESF\_ 0.00000000 sec  
 MONRES\_ 0.01000000 sec  
 ===== CHANNEL f1 =====  
 NUC1\_ 1H  
 P1\_ 12.00 usec  
 PL1\_ 0.00 dB  
 SFO1\_ 500.225015 MHz  
 F2 - Processing parameters  
 SF\_ 500.225022 MHz  
 DS\_ 4  
 SW\_ 802.800 Hz  
 LB\_ 0.30 Hz  
 GB\_ 0  
 PC\_ 4.00  
 ID NAME plot parameters  
 XY\_ 15.00 cm  
 CT\_ 15.00 cm  
 FIP\_ 8.000 Epm  
 FL\_ 4001.76 Hz  
 FZ\_ -560.22 Hz  
 PRACH\_ 0.39474 Epm/cm  
 BECN\_ 197.45258 Hz/cm

Z-restored spin-echo 13C spectrum with 1H decoupling

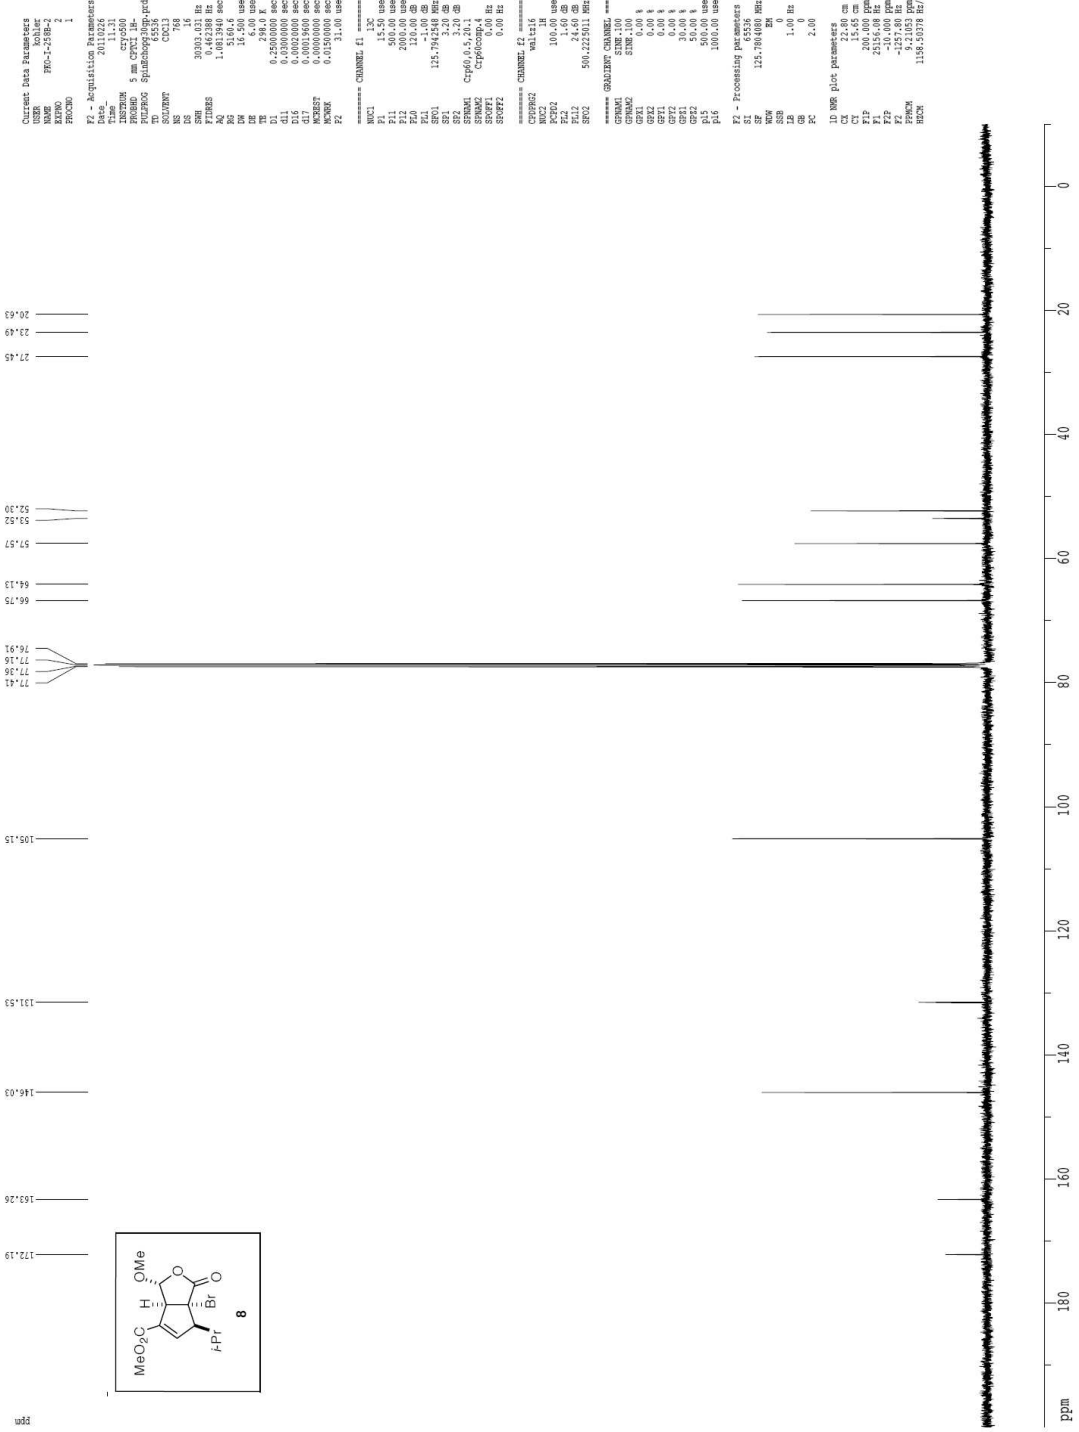

Current Data Parameters  
NAME: 750-5586-2  
EXPNO: 2  
PROCNO: 1

F2 - Acquisition Parameters  
Date\_ 20111223  
Time 11:22  
INSTRUM: cryo500  
PROBHD: 5mm CPXI JN  
PULPROG: zgpg30  
TD: 65536  
SOLVENT: CDCl3  
NS: 16  
DS: 4  
SWH: 30391.033 Hz  
AQ: 0.01000000 sec  
RG: 1.0613840 sec  
RQ: 3196.6  
RE: 4.00 usec  
RF: 6.00 usec  
RT: 0.2500000 K  
RG1: 0.03000000 sec  
RG2: 0.03000000 sec  
RG3: 0.00000000 sec  
RG4: 0.00000000 sec  
RG5: 0.00000000 sec  
RG6: 0.00000000 sec  
RG7: 0.00000000 sec  
RG8: 0.00000000 sec  
RG9: 0.01000000 sec  
RG10: 31.00 usec

===== CHANNEL f1 =====  
NUC1: 13  
P1: 15.50 usec  
PL1: 0.00 usec  
PL2: 0.00 usec  
PL3: 0.00 usec  
PL4: 100.00 dB  
PL5: -1.00 dB  
PL6: -1.00 dB  
SFO1: 125.7603000 MHz  
SFO2: 3.20 dB  
SFO3: 3.20 dB  
SFO4: C13@60.0  
SFO5: C13@60.0  
SFO6: C13@60.0  
SFO7: 0.00 Hz  
SFO8: 0.00 Hz

===== CHANNEL f2 =====  
NUC2: 1H  
P2: 12.00 usec  
PL2: 100.00 usec  
PL3: 0.00 usec  
PL4: 74.40 dB  
PL5: -1.00 dB  
SFO2: 500.2215000 MHz

===== CHANNEL f3 =====  
CHN1: 13C  
SFO1: 100.6261260 MHz  
SFO2: 100.6261260 MHz  
SFO3: 100.6261260 MHz  
SFO4: 100.6261260 MHz  
SFO5: 100.6261260 MHz  
SFO6: 100.6261260 MHz  
SFO7: 100.6261260 MHz  
SFO8: 100.6261260 MHz  
SFO9: 100.6261260 MHz  
SFO10: 100.6261260 MHz  
SFO11: 100.6261260 MHz  
SFO12: 100.6261260 MHz  
SFO13: 100.6261260 MHz  
SFO14: 100.6261260 MHz  
SFO15: 100.6261260 MHz  
SFO16: 100.6261260 MHz  
SFO17: 100.6261260 MHz  
SFO18: 100.6261260 MHz  
SFO19: 100.6261260 MHz  
SFO20: 100.6261260 MHz

F2 - Processing parameters  
SI: 65536  
SF: 125.7603000 MHz  
WDW: EM  
SSB: 0  
RB: 0  
PC: 2.00

1D NMR F2 - parameters  
SI: 65536  
SF: 125.7603000 MHz  
WDW: EM  
SSB: 0  
RB: 0  
PC: 2.00  
CX: 22.80 cm  
CY: 38.15 cm  
CZ: 38.15 cm  
F1: 25356.608 Hz  
F2: -10.000 Hz  
F3: -10.000 Hz  
F4: -10.000 Hz  
F5: -10.000 Hz  
F6: -10.000 Hz  
F7: -10.000 Hz  
F8: -10.000 Hz  
F9: -10.000 Hz  
F10: -10.000 Hz  
F11: -10.000 Hz  
F12: -10.000 Hz  
F13: -10.000 Hz  
F14: -10.000 Hz  
F15: -10.000 Hz  
F16: -10.000 Hz  
F17: -10.000 Hz  
F18: -10.000 Hz  
F19: -10.000 Hz  
F20: -10.000 Hz

<sup>1</sup>H spectrum

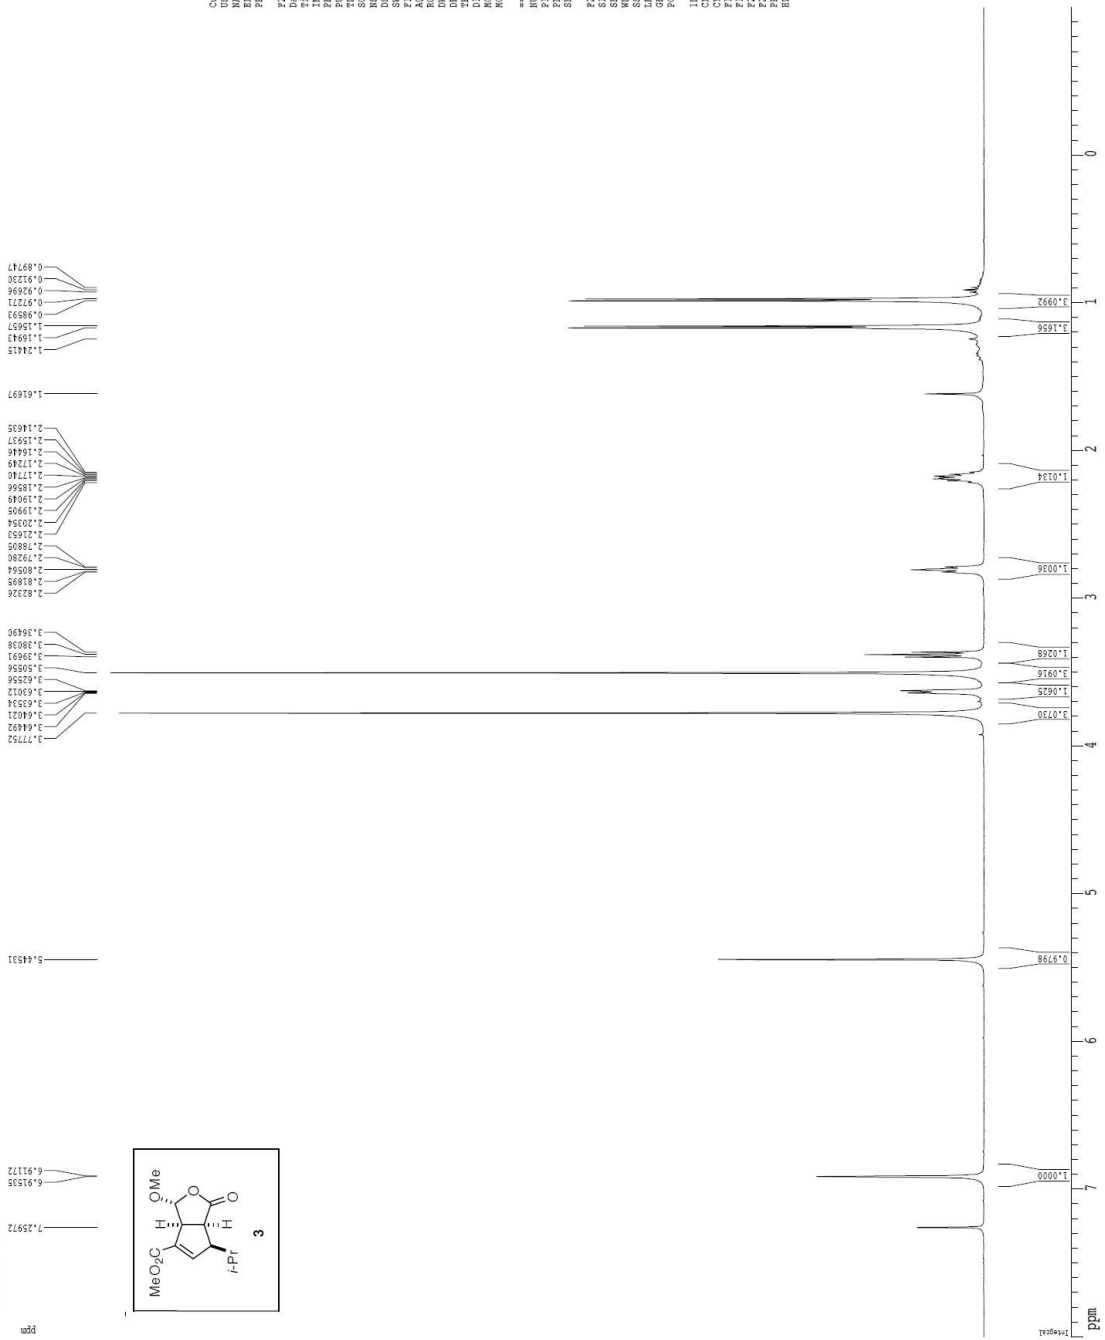

Current Data Parameters  
 USER Kohler  
 METHOD FID-2010228  
 PULSEPROG zgpg30  
 PROCNO 1

F2 - Acquisition Parameters  
 Date\_ 2010228  
 Time 11:03  
 INSTRUM spect  
 PROBP05 5 mm broadband  
 PULPROG zgpg30  
 PCYCL1 2  
 SOLVENT CDCl3  
 NS 8  
 DS 8  
 AQ 8012.82 Hz  
 FIDRES 0.099843 Hz  
 AQ 5.0099874 sec  
 SFO1 499.5134666 MHz  
 DSF1 12.20 usec  
 P1 12.20 usec  
 SFO2 499.5134666 MHz

F2 - Processing parameters  
 SI 32768  
 SF 499.5100125 MHz  
 WDW EM  
 GB 0  
 TB 0.30 Hz  
 SC 1.00

ID NMR plot parameters  
 CX 22.80 cm  
 CT 1.00 cm  
 F1P 8.000 ppm  
 F2 3996.08 Hz  
 F2 450.51 Hz  
 FWHM 0.398474 ppm/cm  
 BECN 197.17502 Hz/cm

13C spectrum with 1H decoupling

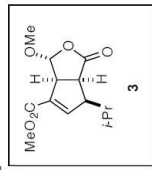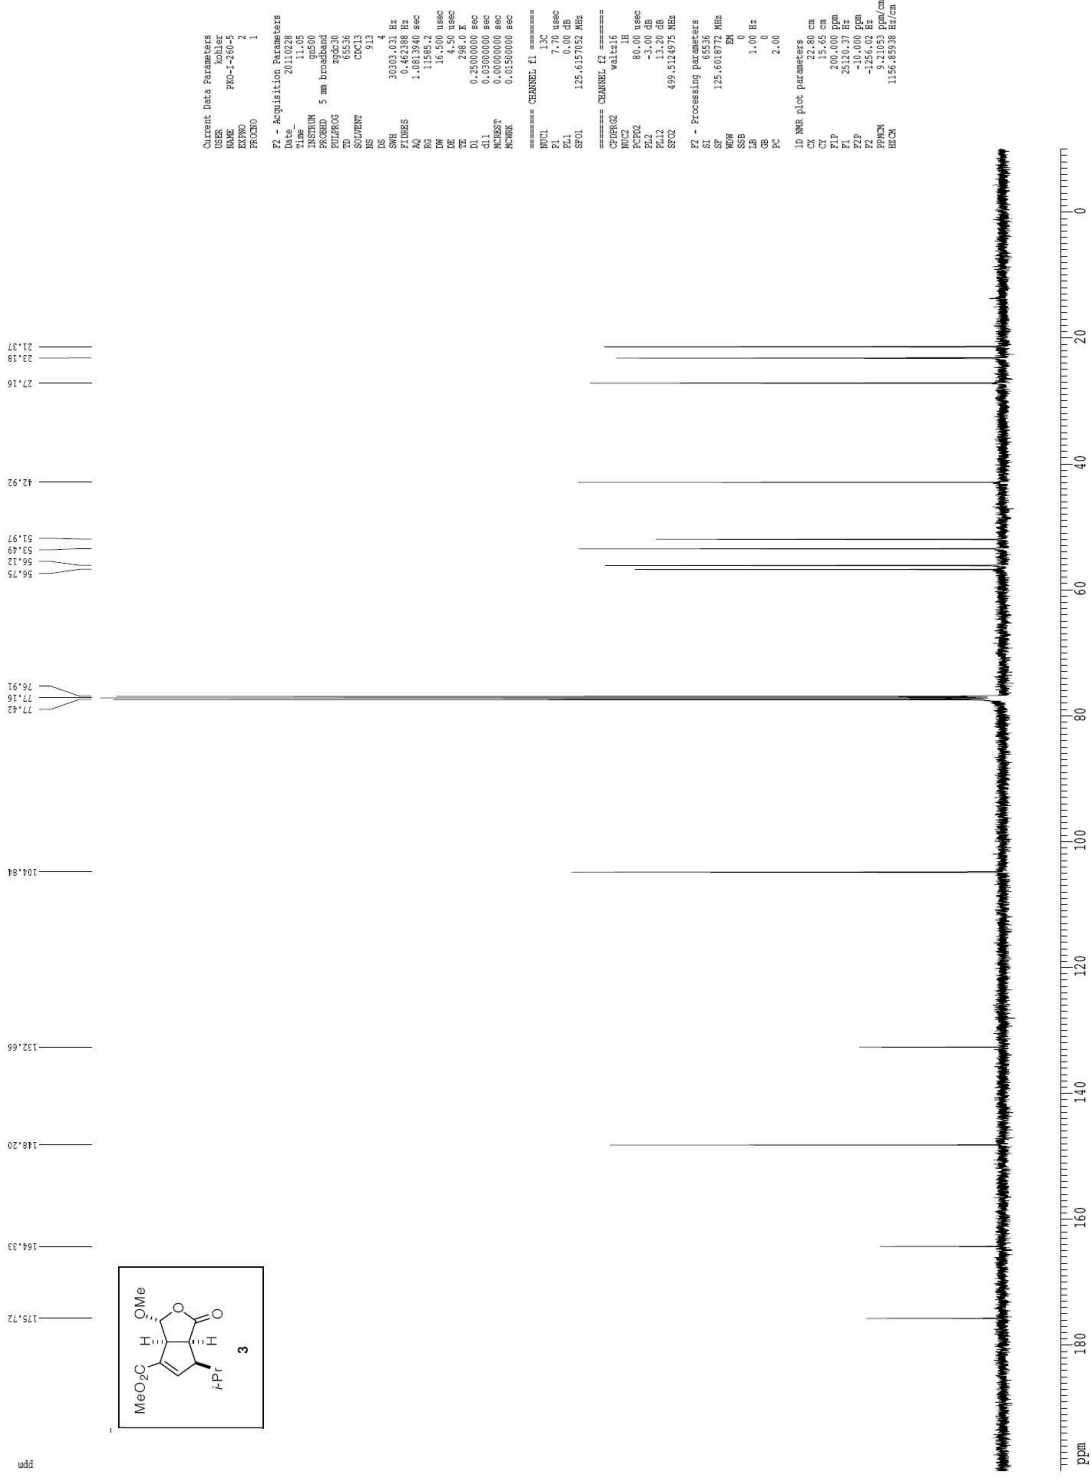

Current Data Parameters  
USER: MOHLER  
NAME: FRC-1-266-5  
EXPNO: 2  
PROCNO: 1  
F2 - Acquisition Parameters  
Date\_ 2011.05  
Time 11.55  
INSTRUM: spect  
PROBHD: 5 mm broadband  
NUC1: 13C  
PULPROG: zgpg30  
SOLVENT: CDCl3  
NS: 513  
DS: 4  
SWH: 30349.031 Hz  
FIDRES: 0.462388 Hz  
AQ: 1.133898 sec  
RG: 118.852  
DF: 16.500 kHz  
DE: 4.50 Hz  
TE: 300.2 K  
D1: 0.2500000 sec  
d11: 0.0300000 sec  
ACQST: 0.0300000 sec  
RG2D: 0.1500000 sec  
===== CHANNEL f1 =====  
NUC1: 13C  
P1: 7.70 Hz  
PC1: 0.00 dB  
SFO1: 125.61762 MHz  
===== CHANNEL f2 =====  
CPDPRG2: waltz16  
NUC2: 1H  
PCPD2: 80.0 Hz  
PCPD1: -3.00 dB  
PCPD2: 13.20 dB  
SFO2: 499.514975 MHz  
F2 - Processing parameters  
SI: 65536  
SF: 125.61762 MHz  
WDW: EM  
SSB: 0  
GB: 1.00 Hz  
PC: 2.00  
F2 - NMR plot parameters  
CX: 22.80 cm  
CY: 15.65 cm  
P1P: 200.00 ppm  
P2P: -10.00 ppm  
F2: -1256.02 Hz  
F3: 4.44 Hz  
RG2D: 1125.45538 Hz/cm

1H spectrum

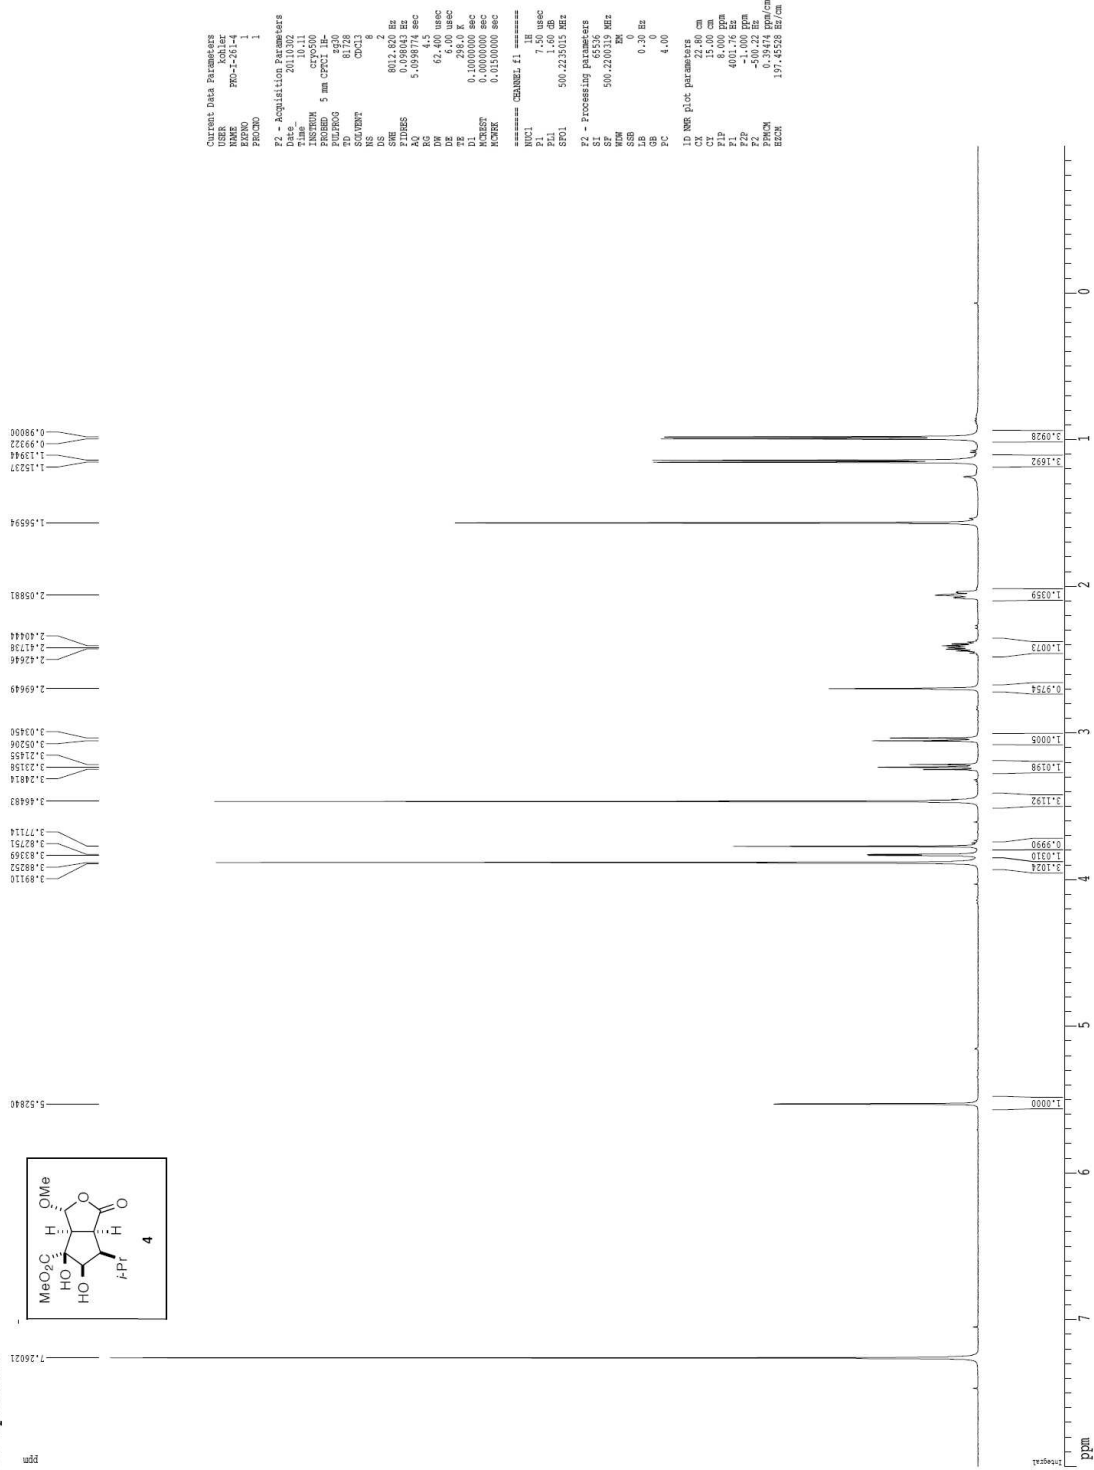

Z-restored spin-echo 13C spectrum with 1H decoupling

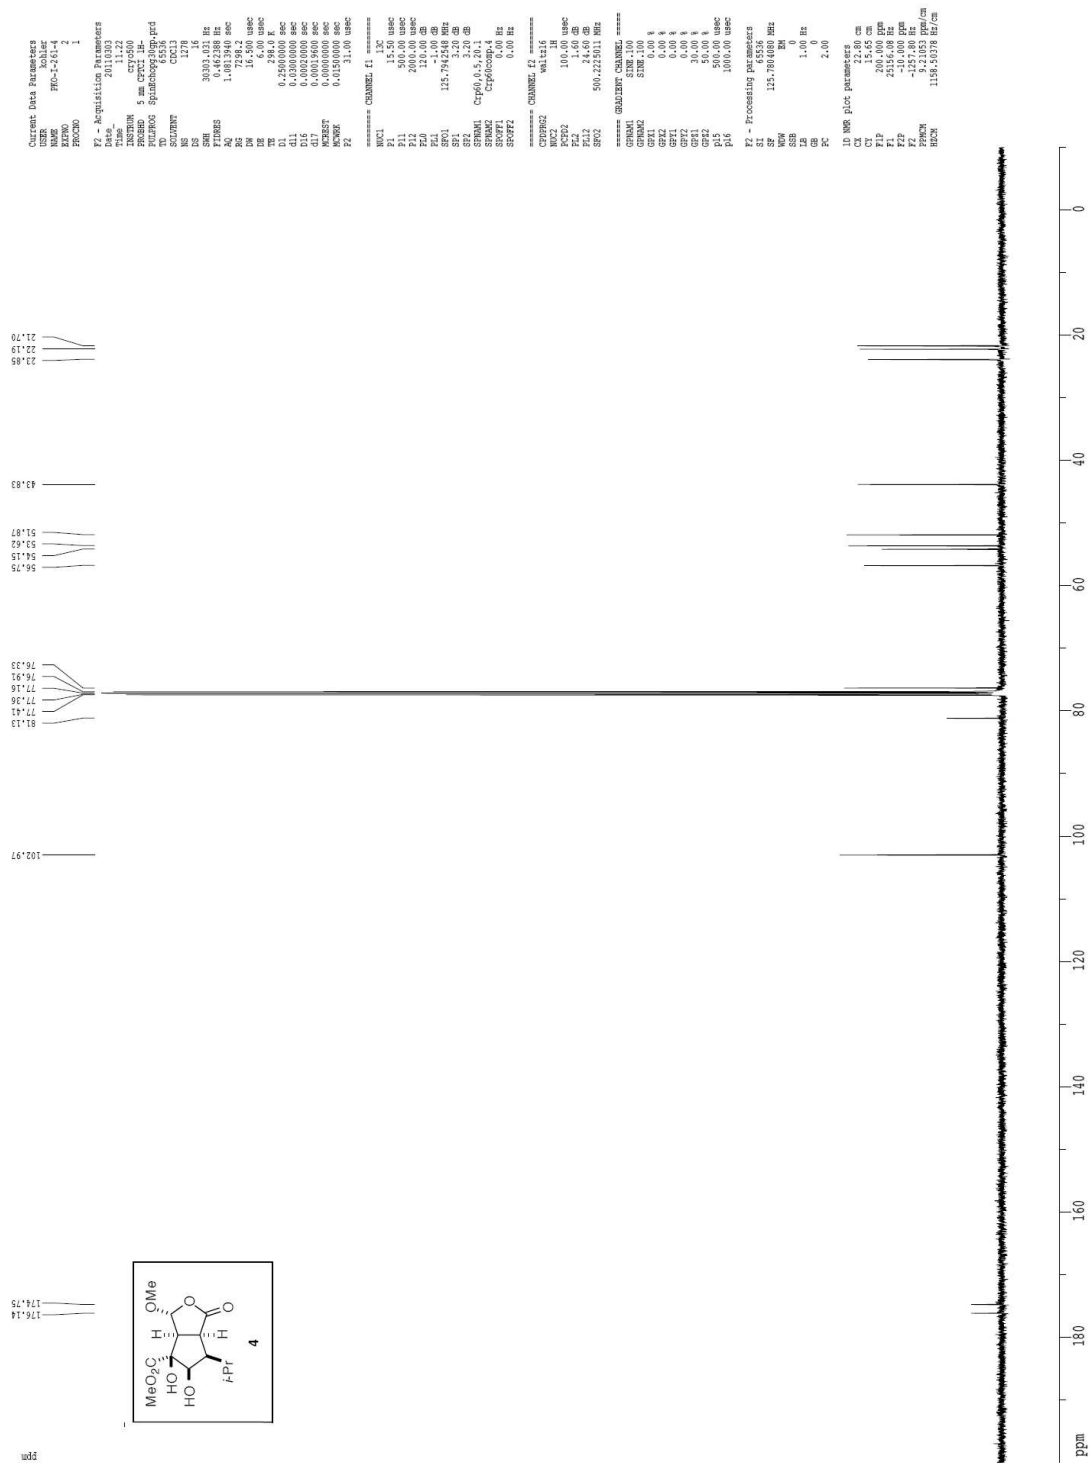

## B. Computational Data

### 1. Cartesian coordinates of stationary points: TS3 $\beta$ , TS3 $\alpha$

The transition state for the  $\beta$ -attack of OsO<sub>4</sub> on compound **3** was obtained at the B3LYP/6-31G\* level. The other conformers of the transition states were generated by manually rotating the isopropyl group by 60°. Out of 6 structures thus generated, 3 transition state conformers were produced (Figure S1). Transition state structures for the  $\alpha$ -attack of OsO<sub>4</sub> on compound **3** were obtained in the same manner, which also gave 3 TS structures (Figure S2).

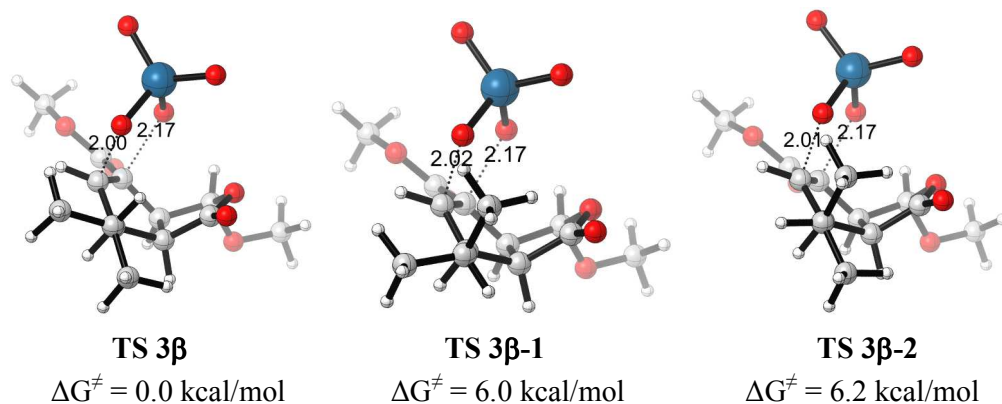

**Figure S1.** Transition state structures for the  $\beta$ -attack of OsO<sub>4</sub> on compound **3**.

### TS3 $\beta$

|   |             |             |             |
|---|-------------|-------------|-------------|
| O | -0.37091987 | -0.22255193 | 0.00000000  |
| O | 0.19583413  | 1.95289307  | -0.06222000 |
| O | -1.05090087 | 3.78144207  | 0.67440800  |
| O | 1.99812713  | 4.51507807  | 3.36139200  |
| O | 3.48416513  | 2.92864307  | 4.00794700  |
| C | -0.21308887 | 0.81902507  | 0.58284100  |
| C | -0.42408387 | 1.11785807  | 2.07208500  |
| C | 0.15207413  | 3.10328007  | 0.81484800  |
| C | 1.56859213  | 2.23639707  | 2.82451900  |
| C | 1.66003513  | 0.90351307  | 3.24565000  |
| C | 0.32646513  | 0.19496907  | 3.07739100  |
| C | 0.19967613  | 2.51822607  | 2.23347700  |
| C | -1.21446687 | 4.42285307  | -0.58831400 |
| C | 2.35183913  | 3.35398507  | 3.41055200  |
| C | 4.31168313  | 3.96435207  | 4.56696700  |
| C | 0.32669313  | -1.33052393 | 2.82497100  |
| C | -1.11208787 | -1.86758293 | 2.77203400  |
| C | 1.13883413  | -2.06353593 | 3.90475000  |
| H | -1.50277987 | 1.10968607  | 2.25184400  |
| H | 1.00932713  | 3.72364107  | 0.54193600  |

|                                               |             |             |              |
|-----------------------------------------------|-------------|-------------|--------------|
| H                                             | 2.34969513  | 0.61575407  | 4.02823500   |
| H                                             | -0.17747487 | 0.34137107  | 4.04989600   |
| H                                             | -0.35155387 | 3.18853507  | 2.90005800   |
| H                                             | -2.15539887 | 4.97394807  | -0.53502900  |
| H                                             | -1.26075587 | 3.69199307  | -1.40334100  |
| H                                             | -0.39143687 | 5.12619907  | -0.77941100  |
| H                                             | 3.76620213  | 4.51513807  | 5.33760300   |
| H                                             | 4.62858213  | 4.65941507  | 3.78543100   |
| H                                             | 0.79309913  | -1.51664693 | 1.85355800   |
| H                                             | -1.66862087 | -1.43517993 | 1.93607200   |
| H                                             | -1.65280487 | -1.65719693 | 3.70513800   |
| H                                             | -1.10469787 | -2.95455393 | 2.63364400   |
| H                                             | 0.73812713  | -1.86850693 | 4.90912100   |
| H                                             | 2.19423413  | -1.77292393 | 3.89295800   |
| H                                             | 1.09531513  | -3.14587193 | 3.73971400   |
| H                                             | 5.17147013  | 3.44933807  | 4.99506500   |
| O                                             | 2.94178013  | 2.38979007  | 1.14961300   |
| O                                             | 2.85825313  | -0.04899093 | 1.96340200   |
| Os                                            | 3.73917713  | 0.87727207  | 0.74019600   |
| O                                             | 5.41510813  | 0.93638207  | 1.09268800   |
| O                                             | 3.33808513  | 0.37156607  | -0.84461600  |
| Sum of electronic and zero-point Energies=    |             |             | -1273.921559 |
| Sum of electronic and thermal Energies=       |             |             | -1273.897653 |
| Sum of electronic and thermal Enthalpies=     |             |             | -1273.896709 |
| Sum of electronic and thermal Free Energies=  |             |             | -1273.976299 |
| Imaginary frequency: -328.36 cm <sup>-1</sup> |             |             |              |

### TS3 $\beta$ -1

|   |             |             |             |
|---|-------------|-------------|-------------|
| O | -0.35608307 | -0.26706231 | 0.00000000  |
| O | -0.68166907 | -2.49186131 | 0.00952800  |
| O | 0.80110093  | -4.09259431 | 0.82893200  |
| O | -2.14380107 | -5.21785831 | 3.46850100  |
| O | -3.88387307 | -3.87665331 | 4.03186200  |
| C | -0.43892207 | -1.29372931 | 0.62220100  |
| C | -0.25518907 | -1.51250331 | 2.12841900  |
| C | -0.49317607 | -3.59787031 | 0.92218000  |
| C | -2.06650407 | -2.90969231 | 2.88877200  |
| C | -2.36635107 | -1.60254231 | 3.29548000  |
| C | -1.13897907 | -0.71890931 | 3.13565600  |
| C | -0.66061407 | -2.98787931 | 2.32021800  |
| C | 1.09119193  | -4.73408831 | -0.41079500 |
| C | -2.67862307 | -4.12728231 | 3.47927300  |



|                                               |             |             |              |
|-----------------------------------------------|-------------|-------------|--------------|
| C                                             | -4.55351007 | -5.01899231 | 4.59501100   |
| C                                             | -1.23178707 | 0.83274669  | 3.07126000   |
| C                                             | -1.63798607 | 1.37956769  | 4.45334800   |
| C                                             | -2.11571807 | 1.46973769  | 1.98628200   |
| H                                             | 0.80502993  | -1.33402731 | 2.33482700   |
| H                                             | -1.24043807 | -4.34684431 | 0.65017500   |
| H                                             | -3.08530207 | -1.41252631 | 4.08152300   |
| H                                             | -0.62071007 | -0.89521831 | 4.09608600   |
| H                                             | -0.02336207 | -3.54374131 | 3.01521600   |
| H                                             | 2.09917193  | -5.14317131 | -0.31841500  |
| H                                             | 1.05621293  | -4.02397831 | -1.24447500  |
| H                                             | 0.38272493  | -5.55247931 | -0.60286700  |
| H                                             | -3.95343007 | -5.45609431 | 5.39725100   |
| H                                             | -4.72790107 | -5.77426331 | 3.82463800   |
| H                                             | -0.19884907 | 1.15802369  | 2.88092400   |
| H                                             | -0.96528407 | 1.03502969  | 5.24880200   |
| H                                             | -2.65893407 | 1.07501769  | 4.71767800   |
| H                                             | -1.61819407 | 2.47480069  | 4.45114700   |
| H                                             | -3.17757307 | 1.30965269  | 2.19177800   |
| H                                             | -1.88736407 | 1.09078669  | 0.99023200   |
| H                                             | -1.93611007 | 2.55184269  | 1.98014900   |
| H                                             | -5.49890607 | -4.63930431 | 4.98195100   |
| O                                             | -3.32971407 | -3.31214631 | 1.17651300   |
| O                                             | -3.80961007 | -0.94178031 | 2.05138700   |
| Os                                            | -4.44965907 | -2.01148931 | 0.79968500   |
| O                                             | -6.06910207 | -2.46637931 | 1.12808800   |
| O                                             | -4.16595007 | -1.37408731 | -0.76360000  |
| Sum of electronic and zero-point Energies=    |             |             | -1273.911459 |
| Sum of electronic and thermal Energies=       |             |             | -1273.887540 |
| Sum of electronic and thermal Enthalpies=     |             |             | -1273.886596 |
| Sum of electronic and thermal Free Energies=  |             |             | -1273.966773 |
| Imaginary frequency: -317.62 cm <sup>-1</sup> |             |             |              |

## TS3 $\beta$ -2

|   |             |             |             |
|---|-------------|-------------|-------------|
| O | -0.19287833 | -0.20771513 | 0.00000000  |
| O | 0.65178167  | 1.84093987  | -0.37442800 |
| O | -0.41993133 | 3.86831387  | 0.04521300  |
| O | 2.65584367  | 4.75683787  | 2.65718200  |
| O | 4.01722367  | 3.16912087  | 3.53500500  |
| C | 0.11786867  | 0.87323387  | 0.42973600  |
| C | -0.04103833 | 1.41544887  | 1.85386100  |
| C | 0.71669067  | 3.11566787  | 0.30805500  |

|                                               |             |             |              |
|-----------------------------------------------|-------------|-------------|--------------|
| C                                             | 2.04603067  | 2.46422987  | 2.45725900   |
| C                                             | 2.01754267  | 1.21360287  | 3.09006700   |
| C                                             | 0.60949867  | 0.64226987  | 3.03865800   |
| C                                             | 0.70947467  | 2.76254187  | 1.80143200   |
| C                                             | -0.52543633 | 4.31175687  | -1.30575600  |
| C                                             | 2.91719167  | 3.59115687  | 2.87708100   |
| C                                             | 4.92966867  | 4.20585487  | 3.93849200   |
| C                                             | 0.32533967  | -0.86465313 | 3.30202900   |
| C                                             | 1.02448767  | -1.91393013 | 2.42230100   |
| C                                             | -1.19694333 | -1.09830913 | 3.29564900   |
| H                                             | -1.11542033 | 1.53993087  | 2.01755800   |
| H                                             | 1.62605767  | 3.60428187  | -0.04919900  |
| H                                             | 2.66856867  | 0.99210887  | 3.92663800   |
| H                                             | 0.15080167  | 1.12691087  | 3.92066100   |
| H                                             | 0.21572567  | 3.57478287  | 2.34406900   |
| H                                             | -1.41214233 | 4.94680187  | -1.35387000  |
| H                                             | -0.63867433 | 3.46705587  | -1.99431000  |
| H                                             | 0.35820867  | 4.89837187  | -1.59491200  |
| H                                             | 4.43744967  | 4.90390887  | 4.62054600   |
| H                                             | 5.29205867  | 4.75302387  | 3.06464100   |
| H                                             | 0.67687467  | -1.02786713 | 4.33259100   |
| H                                             | 2.11082467  | -1.86859913 | 2.51865300   |
| H                                             | 0.76045167  | -1.79878713 | 1.36948300   |
| H                                             | 0.70017067  | -2.91147813 | 2.74389600   |
| H                                             | -1.59394933 | -1.02004013 | 2.27774600   |
| H                                             | -1.72856533 | -0.37977313 | 3.93309200   |
| H                                             | -1.42734333 | -2.10317813 | 3.66580900   |
| H                                             | 5.75072167  | 3.69149387  | 4.43750000   |
| O                                             | 3.42660767  | 2.28221087  | 0.78969900   |
| O                                             | 3.23269367  | 0.02720287  | 2.01255300   |
| Os                                            | 4.17131267  | 0.69471387  | 0.67174100   |
| O                                             | 5.84219867  | 0.75690887  | 1.04731200   |
| O                                             | 3.77759467  | -0.07199313 | -0.80728900  |
| Sum of electronic and zero-point Energies=    |             |             | -1273.911596 |
| Sum of electronic and thermal Energies=       |             |             | -1273.887794 |
| Sum of electronic and thermal Enthalpies=     |             |             | -1273.886850 |
| Sum of electronic and thermal Free Energies=  |             |             | -1273.966464 |
| Imaginary frequency: -315.89 cm <sup>-1</sup> |             |             |              |

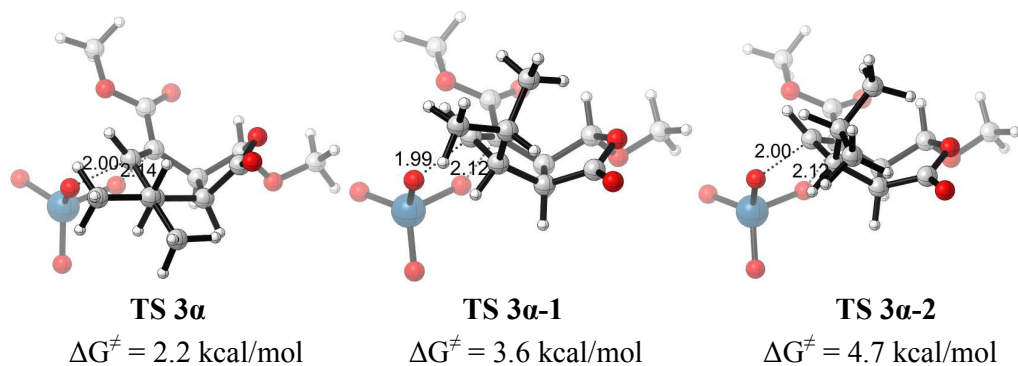

**Figure S2.** Transition state structures for the  $\alpha$ -attack of OsO<sub>4</sub> on compound 3.

### TS3a

|   |             |             |             |
|---|-------------|-------------|-------------|
| O | 0.16320474  | -0.31157270 | 0.00000000  |
| O | 0.60017274  | -2.47639270 | -0.39906900 |
| O | 0.98674274  | -3.44332570 | -2.48613200 |
| O | 3.60024074  | -4.76188670 | 0.34073400  |
| O | 4.96307774  | -3.41766770 | 1.54487300  |
| C | 0.88417674  | -1.14512770 | -0.48637200 |
| C | 2.19611274  | -0.93815170 | -1.26123300 |
| C | 1.50816974  | -3.25413570 | -1.21157300 |
| C | 3.76399174  | -2.42735370 | -0.20969700 |
| C | 4.00498574  | -1.14124570 | 0.29474300  |
| C | 3.27924074  | -0.08697170 | -0.52897500 |
| C | 2.76250874  | -2.37607270 | -1.35847100 |
| C | -0.16210626 | -4.28655070 | -2.52423600 |
| C | 4.07229774  | -3.66410270 | 0.56144600  |
| C | 5.34040874  | -4.55827870 | 2.33822400  |
| C | 2.83521874  | 1.18436630  | 0.23133400  |
| C | 2.10721474  | 2.15661730  | -0.71050000 |
| C | 4.04234674  | 1.88356730  | 0.87969400  |
| H | 1.93909974  | -0.51401470 | -2.23640500 |
| H | 1.65999074  | -4.19666870 | -0.68408100 |
| H | 4.27173374  | -0.98747470 | 1.33146400  |
| H | 3.97810274  | 0.24975830  | -1.30996200 |
| H | 3.23885974  | -2.61057770 | -2.31343400 |
| H | -0.41831426 | -4.41191570 | -3.57808900 |
| H | -1.00626226 | -3.83413970 | -1.99165700 |
| H | 0.05818474  | -5.26925570 | -2.08377800 |
| H | 5.79564374  | -5.32516870 | 1.70702100  |
| H | 4.46547074  | -4.97809970 | 2.84099400  |
| H | 2.13315174  | 0.88978530  | 1.02020000  |

|                                               |            |             |              |
|-----------------------------------------------|------------|-------------|--------------|
| H                                             | 1.18284874 | 1.72226830  | -1.09868100  |
| H                                             | 2.74957274 | 2.44188530  | -1.55477700  |
| H                                             | 1.84055474 | 3.07458930  | -0.17485700  |
| H                                             | 4.77136074 | 2.19638330  | 0.12150400   |
| H                                             | 4.56899774 | 1.24448630  | 1.59643400   |
| H                                             | 3.71334674 | 2.78010530  | 1.41690900   |
| H                                             | 6.05941574 | -4.17966270 | 3.06425300   |
| O                                             | 5.48707274 | -2.84889870 | -1.40444300  |
| O                                             | 5.92773774 | -0.70206970 | -0.06162000  |
| Os                                            | 6.82371574 | -1.72555070 | -1.19017200  |
| O                                             | 7.14446474 | -0.87078370 | -2.64149200  |
| O                                             | 8.16518774 | -2.48259670 | -0.44069700  |
| Sum of electronic and zero-point Energies=    |            |             | -1273.917892 |
| Sum of electronic and thermal Energies=       |            |             | -1273.894039 |
| Sum of electronic and thermal Enthalpies=     |            |             | -1273.893095 |
| Sum of electronic and thermal Free Energies=  |            |             | -1273.972826 |
| Imaginary frequency: -347.50 cm <sup>-1</sup> |            |             |              |

### TS3a-1

|   |            |             |             |
|---|------------|-------------|-------------|
| O | 0.32640948 | 0.04451039  | 0.00000000  |
| O | 0.46620848 | -2.08609961 | 0.70845100  |
| O | 1.30611248 | -4.09055461 | -0.11210600 |
| O | 3.40876648 | -4.68475561 | 2.57108500  |
| O | 4.88572048 | -3.38673061 | 3.69540300  |
| C | 1.00584048 | -0.89848961 | 0.31475300  |
| C | 2.52763348 | -0.96745461 | 0.37661400  |
| C | 1.46051548 | -3.12929761 | 0.86869100  |
| C | 3.76863648 | -2.42674661 | 1.86447500  |
| C | 3.99314748 | -1.11614361 | 2.30724300  |
| C | 3.19720948 | -0.09887761 | 1.51452800  |
| C | 2.84265048 | -2.45199261 | 0.66680900  |
| C | 0.13791948 | -4.89438361 | 0.03235500  |
| C | 3.98205448 | -3.62476561 | 2.72236000  |
| C | 5.17237248 | -4.50267561 | 4.55824400  |
| C | 2.26846948 | 0.78234439  | 2.40472600  |
| C | 3.09770348 | 1.84552339  | 3.14323500  |
| C | 1.40383148 | -0.01195861 | 3.39934400  |
| H | 2.90576248 | -0.63794361 | -0.59413800 |
| H | 1.29891848 | -3.54704561 | 1.86649100  |
| H | 4.29610248 | -0.92036061 | 3.32725100  |
| H | 3.89468548 | 0.59603339  | 1.03428100  |

|                                               |             |             |              |
|-----------------------------------------------|-------------|-------------|--------------|
| H                                             | 3.30964748  | -2.96704761 | -0.17600400  |
| H                                             | 0.18326148  | -5.64740461 | -0.75665000  |
| H                                             | -0.77291952 | -4.29583161 | -0.08254800  |
| H                                             | 0.12714448  | -5.39397861 | 1.01114800   |
| H                                             | 5.56878048  | -5.33858861 | 3.97676600   |
| H                                             | 4.26713948  | -4.82445061 | 5.07954100   |
| H                                             | 1.59527748  | 1.30080839  | 1.71310000   |
| H                                             | 3.66010848  | 2.47395139  | 2.44313400   |
| H                                             | 3.81807848  | 1.39315339  | 3.83685000   |
| H                                             | 2.44450348  | 2.49960839  | 3.73169800   |
| H                                             | 2.01702448  | -0.49262961 | 4.17231400   |
| H                                             | 0.80144548  | -0.78674461 | 2.91604500   |
| H                                             | 0.70964648  | 0.66356439  | 3.91095800   |
| H                                             | 5.91715048  | -4.13801861 | 5.26524300   |
| O                                             | 5.54242748  | -2.97126461 | 0.82907900   |
| O                                             | 5.85511948  | -0.61734361 | 1.79614200   |
| Os                                            | 6.82565748  | -1.76759761 | 0.86680700   |
| O                                             | 7.14111748  | -1.16200061 | -0.70613200  |
| O                                             | 8.18358948  | -2.31914561 | 1.75314600   |
| Sum of electronic and zero-point Energies=    |             |             | -1273.916213 |
| Sum of electronic and thermal Energies=       |             |             | -1273.892327 |
| Sum of electronic and thermal Enthalpies=     |             |             | -1273.890383 |
| Sum of electronic and thermal Free Energies=  |             |             | -1273.970491 |
| Imaginary frequency: -332.00 cm <sup>-1</sup> |             |             |              |

### TS 3a-2

|   |             |             |             |
|---|-------------|-------------|-------------|
| O | -0.29673589 | -0.25222552 | 0.00000000  |
| O | -0.50208689 | 1.93620248  | 0.44835100  |
| O | -1.42546689 | 3.84159848  | -0.50060300 |
| O | -3.57209989 | 4.73980848  | 1.85527000  |
| O | -5.05158789 | 3.63037748  | 3.16407500  |
| C | -1.00564589 | 0.68684248  | 0.25890600  |
| C | -2.52486989 | 0.70172648  | 0.41673500  |
| C | -1.53073489 | 2.95259548  | 0.54938400  |
| C | -3.83624389 | 2.37592648  | 1.59290800  |
| C | -3.98694189 | 1.17580648  | 2.29659800  |
| C | -3.13926789 | 0.05482848  | 1.72640400  |
| C | -2.88540889 | 2.20698148  | 0.43076600  |
| C | -0.30694189 | 4.72078148  | -0.41669400 |
| C | -4.12009589 | 3.70975448  | 2.19141600  |
| C | -5.39935789 | 4.87892348  | 3.79048400  |
| C | -2.23553489 | -0.58026052 | 2.83128000  |

|                                               |             |             |              |
|-----------------------------------------------|-------------|-------------|--------------|
| C                                             | -1.15981989 | 0.35250148  | 3.41161700   |
| C                                             | -1.65100689 | -1.93429452 | 2.39646000   |
| H                                             | -2.93725389 | 0.18539048  | -0.45343100  |
| H                                             | -1.37041289 | 3.45029648  | 1.51124800   |
| H                                             | -4.27851289 | 1.17111848  | 3.33956000   |
| H                                             | -3.80712089 | -0.75471052 | 1.41102800   |
| H                                             | -3.33570489 | 2.54865648  | -0.50452800  |
| H                                             | -0.39047689 | 5.40623748  | -1.26208100  |
| H                                             | 0.63793711  | 4.16918948  | -0.48298700  |
| H                                             | -0.33285089 | 5.29509948  | 0.51979300   |
| H                                             | -5.79487489 | 5.57741348  | 3.04912400   |
| H                                             | -4.52300689 | 5.32205548  | 4.27056800   |
| H                                             | -2.94277689 | -0.79196252 | 3.64792700   |
| H                                             | -1.57611689 | 1.32150748  | 3.71525100   |
| H                                             | -0.34321789 | 0.53885448  | 2.70904100   |
| H                                             | -0.71779889 | -0.10553952 | 4.30356800   |
| H                                             | -0.95827289 | -1.82694952 | 1.55861500   |
| H                                             | -2.44887189 | -2.62439352 | 2.09555200   |
| H                                             | -1.11107289 | -2.39586252 | 3.23148700   |
| H                                             | -6.16053889 | 4.62962948  | 4.52935300   |
| O                                             | -5.60557789 | 2.57445548  | 0.44622000   |
| O                                             | -5.83372889 | 0.49346748  | 1.92802600   |
| Os                                            | -6.83843289 | 1.35729948  | 0.75732800   |
| O                                             | -7.10952189 | 0.39204148  | -0.63379800  |
| O                                             | -8.22878889 | 2.03858048  | 1.48960500   |
| Sum of electronic and zero-point Energies=    |             |             | -1273.913350 |
| Sum of electronic and thermal Energies=       |             |             | -1273.889407 |
| Sum of electronic and thermal Enthalpies=     |             |             | -1273.888463 |
| Sum of electronic and thermal Free Energies=  |             |             | -1273.968883 |
| Imaginary frequency: -331.25 cm <sup>-1</sup> |             |             |              |

## 2. Optimized structures and energies of compound 3

Geometry of compound **3** was optimized at the B3LYP/6-31G\* level. There was only one envelope conformation obtained for the cyclopentene ring after minimization, while the isopropyl group can adopt a variety of different conformations. The other conformers were generated by manually rotating the isopropyl by 60°. Out of 6 structures thus generated, 3 different conformers were produced (Figure S3).

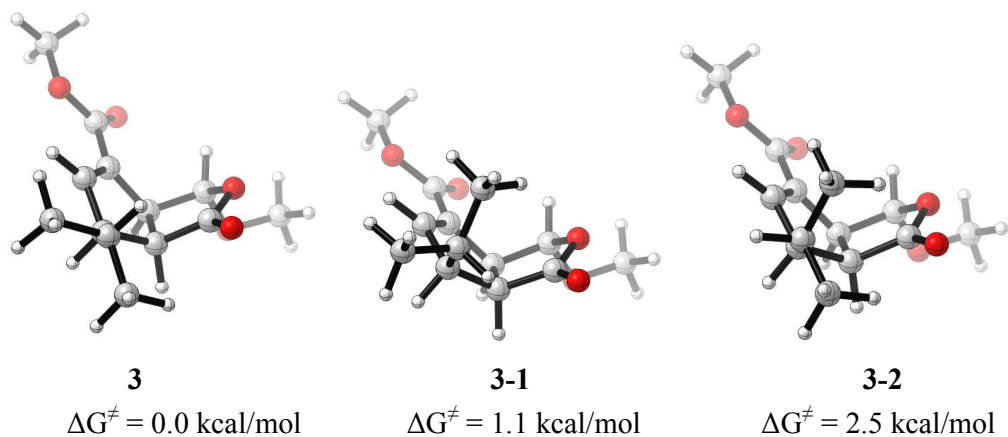

**Figure S3.** Optimized structures of compound **3**.

**3**

|   |             |             |             |
|---|-------------|-------------|-------------|
| C | 0.14836795  | -0.60830860 | 0.00000000  |
| C | 0.26617795  | 0.14796840  | 1.33240600  |
| C | -1.94604905 | 0.40567640  | 0.68558300  |
| C | -1.38233805 | -0.72334460 | -0.18527500 |
| H | 0.63385595  | 0.00242240  | -0.76676800 |
| H | -1.72892905 | -0.57825260 | -1.21352400 |
| C | -1.66367605 | -2.13057860 | 0.30596000  |
| C | 0.69518795  | -2.07390860 | 0.01135900  |
| H | 0.90140795  | -2.34138560 | -1.04068700 |
| C | -0.53657705 | -2.85034860 | 0.41995600  |
| H | -0.51633905 | -3.89474160 | 0.70930500  |
| O | -0.95778105 | 0.61241340  | 1.71942000  |
| O | 1.25281695  | 0.35130040  | 1.99338600  |
| C | 2.00442195  | -2.36673160 | 0.78439300  |
| C | 3.16735295  | -1.53721660 | 0.21779200  |
| C | 2.34942395  | -3.86452560 | 0.73530500  |
| H | 1.86267195  | -2.07733960 | 1.83157500  |
| H | 2.98567695  | -0.46619260 | 0.33452600  |
| H | 4.09764595  | -1.77339860 | 0.74679800  |
| H | 3.32689695  | -1.75738060 | -0.84676600 |
| H | 1.59536995  | -4.48694760 | 1.22914800  |
| H | 2.45138295  | -4.21666660 | -0.30003500 |
| H | 3.30411195  | -4.04913160 | 1.24040700  |
| C | -3.04295905 | -2.61118160 | 0.52365300  |
| O | -4.03631205 | -1.93064960 | 0.33645400  |
| O | -3.09008605 | -3.89172860 | 0.95501600  |
| C | -4.40849805 | -4.41159960 | 1.18948600  |
| H | -4.99750505 | -4.39677760 | 0.26854900  |

|                                              |             |             |             |
|----------------------------------------------|-------------|-------------|-------------|
| H                                            | -4.26056105 | -5.43542560 | 1.53400000  |
| H                                            | -4.92504405 | -3.82049460 | 1.95041600  |
| H                                            | -2.88041505 | 0.16443640  | 1.20038900  |
| O                                            | -2.07446605 | 1.54261540  | -0.10468700 |
| C                                            | -2.64297305 | 2.65977140  | 0.57319700  |
| H                                            | -1.99360105 | 3.00723340  | 1.38472700  |
| H                                            | -2.75345405 | 3.45050340  | -0.17166500 |
| H                                            | -3.63105105 | 2.40767640  | 0.98436900  |
| Sum of electronic and zero-point Energies=   |             |             | -882.044509 |
| Sum of electronic and thermal Energies=      |             |             | -882.026241 |
| Sum of electronic and thermal Enthalpies=    |             |             | -882.025297 |
| Sum of electronic and thermal Free Energies= |             |             | -882.091339 |

### 3-1

|   |             |             |             |
|---|-------------|-------------|-------------|
| C | 0.35608307  | -0.19287834 | 0.00000000  |
| C | 0.75695607  | 0.75827966  | 1.12672900  |
| C | -1.56653793 | 0.82062766  | 1.12065400  |
| C | -1.18537693 | -0.27393034 | 0.10517700  |
| H | 0.70303707  | 0.26098566  | -0.93219500 |
| H | -1.70783793 | -0.05018534 | -0.82981800 |
| C | -1.43935793 | -1.69915334 | 0.54725400  |
| C | 0.90363907  | -1.66524134 | 0.11829500  |
| H | 1.16966207  | -1.98374434 | -0.90149700 |
| C | -0.32106293 | -2.43846234 | 0.53673100  |
| H | -0.29323893 | -3.49518134 | 0.78111300  |
| O | -0.34778593 | 1.15202066  | 1.82608400  |
| O | 1.86292207  | 1.14190166  | 1.41022600  |
| C | 2.16727107  | -1.91528534 | 0.99376300  |
| C | 2.88061707  | -3.19973134 | 0.54176000  |
| C | 1.86864807  | -1.97421234 | 2.50163700  |
| H | 2.84292807  | -1.07047134 | 0.81915200  |
| H | 3.18027407  | -3.14494334 | -0.51172500 |
| H | 3.78426507  | -3.37065534 | 1.13774900  |
| H | 2.23915107  | -4.08297534 | 0.66130900  |
| H | 1.32211207  | -1.09752734 | 2.85947000  |
| H | 1.27985807  | -2.86413134 | 2.75713400  |
| H | 2.80577807  | -2.02547234 | 3.06699700  |
| C | -2.80248093 | -2.16093334 | 0.87808000  |
| O | -3.78073693 | -1.43498134 | 0.88054800  |
| O | -2.85181593 | -3.47738334 | 1.18461200  |
| C | -4.15389893 | -3.97806634 | 1.52701200  |
| H | -4.84910093 | -3.84371634 | 0.69405400  |



|                                              |             |             |             |
|----------------------------------------------|-------------|-------------|-------------|
| H                                            | -4.01149393 | -5.03767734 | 1.74102000  |
| H                                            | -4.54744093 | -3.45798334 | 2.40451900  |
| H                                            | -2.28119893 | 0.50199666  | 1.88587200  |
| O                                            | -2.03120293 | 1.92439666  | 0.41784100  |
| C                                            | -2.49431593 | 2.98967466  | 1.24300300  |
| H                                            | -1.67899693 | 3.41864366  | 1.83640800  |
| H                                            | -2.89666493 | 3.74945466  | 0.56988500  |
| H                                            | -3.29087993 | 2.64465766  | 1.91780500  |
| Sum of electronic and zero-point Energies=   |             |             | -882.042088 |
| Sum of electronic and thermal Energies=      |             |             | -882.023727 |
| Sum of electronic and thermal Enthalpies=    |             |             | -882.022783 |
| Sum of electronic and thermal Free Energies= |             |             | -882.089635 |

### 3-2

|   |             |             |             |
|---|-------------|-------------|-------------|
| C | -0.34124628 | -0.54896142 | 0.00000000  |
| C | 0.09955672  | 0.20479358  | 1.26145800  |
| C | -2.10109028 | 0.86215658  | 0.92882700  |
| C | -1.87231828 | -0.30990042 | -0.03602600 |
| H | 0.18499172  | -0.07931542 | -0.83634200 |
| H | -2.25686528 | -0.02027342 | -1.01924200 |
| C | -2.44249328 | -1.64308442 | 0.40495800  |
| C | -0.15339528 | -2.10936042 | -0.03862100 |
| H | -0.06388828 | -2.35766942 | -1.11003700 |
| C | -1.50864128 | -2.60521742 | 0.40183600  |
| H | -1.70388928 | -3.64755442 | 0.63340800  |
| O | -0.96067128 | 0.85801558  | 1.81649700  |
| O | 1.20450672  | 0.28687358  | 1.73624500  |
| C | 1.05130472  | -2.82813142 | 0.63014400  |
| C | 1.01354872  | -2.88281342 | 2.16663800  |
| C | 2.39544072  | -2.29696142 | 0.10998100  |
| H | 0.95524872  | -3.86788642 | 0.27883200  |
| H | 0.05155172  | -3.25901542 | 2.53548100  |
| H | 1.79236872  | -3.56421442 | 2.52895700  |
| H | 1.19544372  | -1.90434842 | 2.61506900  |
| H | 2.43172472  | -2.30853842 | -0.98702000 |
| H | 2.56818772  | -1.27385142 | 0.45470800  |
| H | 3.21924372  | -2.92152442 | 0.47460100  |
| C | -3.88145128 | -1.80523942 | 0.69285000  |
| O | -4.69296128 | -0.89873842 | 0.62553900  |
| O | -4.20719828 | -3.07019542 | 1.04230700  |
| C | -5.59587028 | -3.28530442 | 1.34025700  |

|                                              |             |             |             |
|----------------------------------------------|-------------|-------------|-------------|
| H                                            | -6.21633728 | -3.05533642 | 0.46998200  |
| H                                            | -5.67736728 | -4.34066742 | 1.60168900  |
| H                                            | -5.91145528 | -2.65628042 | 2.17694900  |
| H                                            | -2.98396428 | 0.76292258  | 1.56695000  |
| O                                            | -2.13441828 | 2.03762558  | 0.18820600  |
| C                                            | -2.39972228 | 3.20540358  | 0.96084800  |
| H                                            | -1.59162928 | 3.40447758  | 1.67371600  |
| H                                            | -2.47644328 | 4.03348958  | 0.25331100  |
| H                                            | -3.34828128 | 3.10614858  | 1.50781000  |
| Sum of electronic and zero-point Energies=   |             |             | -882.040738 |
| Sum of electronic and thermal Energies=      |             |             | -882.022545 |
| Sum of electronic and thermal Enthalpies=    |             |             | -882.021601 |
| Sum of electronic and thermal Free Energies= |             |             | -882.087383 |

### 3. Cartesian coordinates of stationary points: R9, R11, R11', R13, R13'

#### R9

|                                              |             |             |             |
|----------------------------------------------|-------------|-------------|-------------|
| C                                            | 0.22255192  | -0.62314539 | 0.00000000  |
| C                                            | -1.29574608 | 1.22712661  | -0.43735800 |
| C                                            | 0.17437692  | 0.93258861  | -0.11133800 |
| H                                            | 0.18864392  | -0.99672639 | 1.02753100  |
| H                                            | 0.48667292  | 1.42065861  | 0.82032800  |
| C                                            | 1.15339392  | 1.21273961  | -1.23174100 |
| C                                            | 1.47036692  | -1.08635639 | -0.77669800 |
| H                                            | 2.28098692  | -1.36978039 | -0.09025000 |
| C                                            | 1.84168892  | 0.12812961  | -1.59497200 |
| H                                            | 2.60133292  | 0.10135561  | -2.37088400 |
| H                                            | -1.44657408 | 2.01184061  | -1.18306300 |
| H                                            | 1.24026292  | -1.97125539 | -1.38123800 |
| H                                            | 1.26350992  | 2.20290861  | -1.66559300 |
| H                                            | -1.87340408 | 1.50545061  | 0.45256400  |
| C                                            | -1.84311308 | -0.09707339 | -0.95952900 |
| O                                            | -0.96580208 | -1.10018439 | -0.66892900 |
| O                                            | -2.88503008 | -0.29900139 | -1.52542700 |
| Sum of electronic and zero-point Energies=   |             |             | -421.860021 |
| Sum of electronic and thermal Energies=      |             |             | -421.853099 |
| Sum of electronic and thermal Enthalpies=    |             |             | -421.852155 |
| Sum of electronic and thermal Free Energies= |             |             | -421.891727 |

#### R11

|   |             |            |            |
|---|-------------|------------|------------|
| C | -0.40059346 | 0.22255193 | 0.00000000 |
|---|-------------|------------|------------|

|                                              |             |             |             |
|----------------------------------------------|-------------|-------------|-------------|
| C                                            | 0.31494054  | -1.15834407 | 0.03817100  |
| H                                            | -0.38528446 | 0.71312093  | 0.97912000  |
| H                                            | 0.41691254  | -1.59596007 | 1.04196400  |
| C                                            | -0.56361346 | -2.02772707 | -0.83989900 |
| C                                            | -1.84478746 | -0.06720907 | -0.48228800 |
| H                                            | -2.55914946 | -0.09358707 | 0.35371700  |
| C                                            | -1.72457146 | -1.43165507 | -1.12451500 |
| H                                            | -2.21143646 | 0.70160293  | -1.17610600 |
| H                                            | -0.25177746 | -3.01595307 | -1.16368800 |
| C                                            | 0.43030954  | 1.05549793  | -1.01617700 |
| H                                            | 0.06371754  | 0.85624393  | -2.03101300 |
| H                                            | 0.33531454  | 2.13190693  | -0.84172800 |
| H                                            | -2.51825846 | -1.87156207 | -1.72259100 |
| C                                            | 1.72586254  | -0.93338307 | -0.53144200 |
| O                                            | 2.56594654  | -1.79424507 | -0.67472800 |
| C                                            | 1.87321354  | 0.54644893  | -0.88669600 |
| H                                            | 2.50028954  | 0.68201393  | -1.77254200 |
| H                                            | 2.38919554  | 1.03273593  | -0.04492500 |
| Sum of electronic and zero-point Energies=   |             |             | -385.911661 |
| Sum of electronic and thermal Energies=      |             |             | -385.904338 |
| Sum of electronic and thermal Enthalpies=    |             |             | -385.903394 |
| Sum of electronic and thermal Free Energies= |             |             | -385.943645 |

## R11'

|   |             |             |             |
|---|-------------|-------------|-------------|
| C | -0.28189910 | -0.01483680 | 0.00000000  |
| C | -0.99544210 | -1.39901980 | -0.07418700 |
| H | 0.07560690  | 0.29632920  | -0.98582200 |
| H | -1.23495210 | -1.73450980 | -1.09126600 |
| C | -0.06193110 | -2.34908380 | 0.64290100  |
| C | 0.93916690  | -0.22369380 | 0.95051200  |
| H | 1.87286990  | 0.14342920  | 0.50394600  |
| C | 0.97147990  | -1.71200680 | 1.19907700  |
| H | 0.82041990  | 0.33094220  | 1.89397900  |
| H | -0.26850110 | -3.41270580 | 0.71278900  |
| C | -1.35367310 | 0.97848320  | 0.52242500  |
| C | -2.29869410 | 0.13465820  | 1.39291200  |
| H | -0.91124310 | 1.82287020  | 1.06120700  |
| H | -1.91401910 | 1.39522020  | -0.32382500 |
| H | 1.75202890  | -2.19036780 | 1.78504400  |
| H | -3.31077310 | 0.53241020  | 1.50637700  |
| H | -1.88641210 | -0.00570080 | 2.40316700  |
| C | -2.31545310 | -1.23365780 | 0.70935700  |

|                                              |             |             |             |
|----------------------------------------------|-------------|-------------|-------------|
| O                                            | -3.20180110 | -2.05649080 | 0.76788300  |
| Sum of electronic and zero-point Energies=   |             |             | -385.910669 |
| Sum of electronic and thermal Energies=      |             |             | -385.903268 |
| Sum of electronic and thermal Enthalpies=    |             |             | -385.902324 |
| Sum of electronic and thermal Free Energies= |             |             | -385.942976 |

### R13

|                                              |             |             |             |
|----------------------------------------------|-------------|-------------|-------------|
| C                                            | -0.48961422 | -0.01483680 | 0.00000000  |
| C                                            | -0.31184222 | -1.56458080 | 0.02344800  |
| H                                            | -0.45946122 | 0.40483520  | 1.00909400  |
| H                                            | -0.45423422 | -2.01792080 | 1.01060800  |
| C                                            | -1.31143022 | -2.05952580 | -0.98922000 |
| C                                            | -1.85763222 | 0.22909820  | -0.68812000 |
| H                                            | -2.63905022 | 0.46790520  | 0.04710400  |
| C                                            | -2.14698022 | -1.08954280 | -1.36906200 |
| H                                            | -2.96999422 | -1.21581380 | -2.06743900 |
| H                                            | -1.83016622 | 1.07272820  | -1.38994300 |
| H                                            | -1.33511822 | -3.09286280 | -1.32026100 |
| C                                            | 1.69324878  | -0.74529080 | -0.81852800 |
| O                                            | 2.83756178  | -0.76804780 | -1.18893900 |
| C                                            | 0.73526878  | 0.44207020  | -0.80701900 |
| H                                            | 0.48204278  | 0.66952820  | -1.84999300 |
| H                                            | 1.24271178  | 1.32053020  | -0.40038500 |
| O                                            | 1.05692878  | -1.85389880 | -0.34467100 |
| Sum of electronic and zero-point Energies=   |             |             | -421.858473 |
| Sum of electronic and thermal Energies=      |             |             | -421.851512 |
| Sum of electronic and thermal Enthalpies=    |             |             | -421.850567 |
| Sum of electronic and thermal Free Energies= |             |             | -421.890353 |

### R13'

|   |             |             |             |
|---|-------------|-------------|-------------|
| C | 0.51928781  | 0.19287834  | 0.00000000  |
| C | -0.60441919 | -1.84100066 | -0.71210700 |
| C | -1.21860519 | -0.83110366 | -1.33234500 |
| C | -0.57146119 | 0.50555634  | -1.06471700 |
| C | 0.57304781  | -1.36434466 | 0.09164100  |
| H | 0.22318081  | 0.61490934  | 0.96365100  |
| H | -2.08165419 | -0.93639066 | -1.98455700 |
| H | -1.29145519 | 1.24961734  | -0.70081800 |
| H | 0.59150181  | -1.74824966 | 1.11733800  |
| H | -0.14273419 | 0.92248434  | -1.98748200 |

|                                              |             |             |             |
|----------------------------------------------|-------------|-------------|-------------|
| H                                            | -0.87331019 | -2.89007366 | -0.78097200 |
| C                                            | 2.61554681  | -0.71873266 | -0.83610200 |
| O                                            | 3.67945281  | -0.84610466 | -1.38384000 |
| C                                            | 1.95680181  | 0.57722034  | -0.36534300 |
| H                                            | 2.04037381  | 1.33780934  | -1.14626600 |
| H                                            | 2.52508081  | 0.94171734  | 0.49866700  |
| O                                            | 1.82418081  | -1.78077366 | -0.52033600 |
| Sum of electronic and zero-point Energies=   |             |             | -421.858026 |
| Sum of electronic and thermal Energies=      |             |             | -421.850978 |
| Sum of electronic and thermal Enthalpies=    |             |             | -421.850034 |
| Sum of electronic and thermal Free Energies= |             |             | -421.890407 |

#### 4. Cartesian coordinates of stationary points: TS9 $\beta$ , TS11 $\beta$ , TS13 $\beta$

##### TS9 $\beta$

|                                              |             |                  |             |
|----------------------------------------------|-------------|------------------|-------------|
| C                                            | 0.10385756  | -0.04451039      | 0.00000000  |
| C                                            | 0.34341356  | 1.49053661       | 1.85088400  |
| C                                            | 1.59342856  | -0.81375139      | 1.72657900  |
| C                                            | 1.89558356  | -1.54095839      | 0.58151400  |
| C                                            | 0.90740956  | -1.24391939      | -0.52384600 |
| C                                            | 0.31817856  | -0.00840739      | 1.53764100  |
| H                                            | -0.94952644 | -0.07914939      | -0.29600300 |
| H                                            | 1.03886656  | 1.78720561       | 2.63631500  |
| H                                            | 2.47040756  | -2.45826539      | 0.59864000  |
| H                                            | 0.24147456  | -2.10615939      | -0.66934700 |
| H                                            | -0.49303544 | -0.52185139      | 2.06991400  |
| O                                            | 3.10309456  | 0.67284261       | 1.83897600  |
| O                                            | 3.62692456  | -0.73367039      | -0.24829100 |
| Os                                           | 4.35075256  | 0.63208661       | 0.59407100  |
| O                                            | 5.87807656  | 0.21188361       | 1.25149800  |
| O                                            | 4.32632156  | 2.04511961       | -0.37078900 |
| H                                            | 1.38209656  | -1.03311239      | -1.48695100 |
| H                                            | 1.93596356  | -1.09284139      | 2.71547600  |
| H                                            | -0.65400744 | 1.85951061       | 2.11940100  |
| C                                            | 0.75144756  | 2.12999261       | 0.52588100  |
| O                                            | 0.65219556  | 1.19969561       | -0.47939900 |
| O                                            | 1.10253956  | 3.25914561       | 0.32023900  |
| Sum of electronic and zero-point Energies=   |             |                  | -813.746072 |
| Sum of electronic and thermal Energies=      |             |                  | -813.733861 |
| Sum of electronic and thermal Enthalpies=    |             |                  | -813.732917 |
| Sum of electronic and thermal Free Energies= |             |                  | -813.786468 |
| Imaginary frequency:                         | -325.47     | cm <sup>-1</sup> |             |

## TS11 $\beta$

|                                              |             |                  |             |
|----------------------------------------------|-------------|------------------|-------------|
| C                                            | -0.26706230 | -0.51928783      | 0.00000000  |
| C                                            | -0.39527230 | -1.23533383      | 1.37122700  |
| H                                            | 0.78049770  | -0.29731083      | -0.22764200 |
| H                                            | 0.45870470  | -1.07688383      | 2.04412800  |
| C                                            | -1.62534130 | -0.62121783      | 2.00314500  |
| C                                            | -1.09567230 | 0.78234517       | 0.13881100  |
| H                                            | -0.45013730 | 1.63760517       | 0.38599200  |
| C                                            | -2.01568330 | 0.51594817       | 1.30831900  |
| H                                            | -1.63860030 | 1.05172317       | -0.77432800 |
| H                                            | -1.89052530 | -0.82394583      | 3.03273200  |
| C                                            | -0.81465330 | -1.53756883      | -1.04208200 |
| C                                            | -0.56230430 | -2.93472083      | -0.45104900 |
| H                                            | -1.88686630 | -1.38124583      | -1.19743700 |
| H                                            | -0.33869530 | -1.40377783      | -2.01844800 |
| H                                            | -2.61249630 | 1.30208117       | 1.75483800  |
| H                                            | 0.40236570  | -3.34746183      | -0.77843500 |
| H                                            | -1.32638930 | -3.67699983      | -0.70176000 |
| O                                            | -3.15944130 | -2.07265183      | 1.60592400  |
| O                                            | -3.80806830 | 0.04589617       | 0.29741000  |
| Os                                           | -4.47806630 | -1.56054483      | 0.56051900  |
| O                                            | -4.47748730 | -2.47016183      | -0.89598200 |
| O                                            | -5.96590630 | -1.48449683      | 1.41030000  |
| C                                            | -0.47375330 | -2.74970983      | 1.06644200  |
| O                                            | -0.41339730 | -3.62732983      | 1.89356500  |
| Sum of electronic and zero-point Energies=   |             |                  | -777.799982 |
| Sum of electronic and thermal Energies=      |             |                  | -777.787182 |
| Sum of electronic and thermal Enthalpies=    |             |                  | -777.786237 |
| Sum of electronic and thermal Free Energies= |             |                  | -777.841192 |
| Imaginary frequency:                         | -288.22     | cm <sup>-1</sup> |             |

## TS13 $\beta$

|   |             |             |             |
|---|-------------|-------------|-------------|
| C | 0.25222551  | -0.19287834 | 0.00000000  |
| C | -1.27939249 | 0.33272366  | 1.82148700  |
| C | -1.61020749 | 1.16246966  | 0.75764900  |
| C | -0.63167749 | 1.01659966  | -0.38828600 |
| C | 0.02527351  | -0.38825234 | 1.52909200  |
| H | 1.30651851  | 0.00739066  | -0.20877500 |
| H | -2.21904749 | 2.05141366  | 0.86860700  |
| H | -0.02606649 | 1.93040566  | -0.46227700 |
| H | 0.82117451  | 0.04843366  | 2.14393200  |

|                                               |             |             |             |
|-----------------------------------------------|-------------|-------------|-------------|
| O                                             | -2.68667849 | -1.22380434 | 1.80417400  |
| O                                             | -3.33620249 | 0.35911066  | -0.11285200 |
| Os                                            | -3.97045449 | -1.11782034 | 0.60609500  |
| O                                             | -5.49924149 | -0.85177734 | 1.33411900  |
| O                                             | -3.87586449 | -2.41976834 | -0.50591600 |
| H                                             | -1.13567949 | 0.89782566  | -1.35374700 |
| H                                             | -1.60990349 | 0.50070666  | 2.83883000  |
| C                                             | -0.06659449 | -2.51923834 | 0.63659200  |
| O                                             | -0.09363649 | -3.71919034 | 0.63555800  |
| O                                             | 0.04022851  | -1.79392634 | 1.79470600  |
| C                                             | -0.13194749 | -1.56994234 | -0.56037100 |
| H                                             | -1.14973749 | -1.60159834 | -0.96628400 |
| H                                             | 0.53334951  | -1.93338434 | -1.34750900 |
| Sum of electronic and zero-point Energies=    |             |             | -813.742092 |
| Sum of electronic and thermal Energies=       |             |             | -813.729848 |
| Sum of electronic and thermal Enthalpies=     |             |             | -813.728904 |
| Sum of electronic and thermal Free Energies=  |             |             | -813.782831 |
| Imaginary frequency: -323.63 cm <sup>-1</sup> |             |             |             |

## 5. Cartesian coordinates of stationary points: TS9 $\alpha$ , TS11 $\alpha$ , TS13 $\alpha$

### TS9 $\alpha$

|    |             |             |             |
|----|-------------|-------------|-------------|
| C  | -0.75667653 | -0.19287834 | 0.00000000  |
| C  | 0.07029547  | -2.41780034 | -0.53719800 |
| C  | -2.07850453 | -1.46564234 | -1.57401200 |
| C  | -2.28488653 | -0.12334534 | -1.86655900 |
| C  | -1.61901953 | 0.76844466  | -0.84105200 |
| C  | -1.23668553 | -1.64269834 | -0.32357200 |
| H  | -0.76264353 | 0.04584966  | 1.06713900  |
| H  | 0.05068147  | -3.12379134 | -1.37154800 |
| H  | -2.54956953 | 0.23244966  | -2.85413000 |
| H  | -2.36013553 | 1.29208066  | -0.22573600 |
| H  | -1.83302553 | -2.07235334 | 0.48700300  |
| O  | -3.90508453 | -2.20520734 | -0.84019200 |
| O  | -4.29945853 | 0.26884766  | -1.40864800 |
| Os | -5.24036153 | -1.06164334 | -0.74246500 |
| O  | -5.66134853 | -0.75209834 | 0.89164100  |
| O  | -6.52710353 | -1.50529734 | -1.78443800 |
| H  | -0.98781353 | 1.53333166  | -1.30554900 |
| H  | -2.16803753 | -2.25487134 | -2.31077000 |
| H  | 0.36254347  | -2.98115634 | 0.35668600  |
| O  | 0.61159347  | -0.12121734 | -0.45193500 |

|                                              |                          |             |             |
|----------------------------------------------|--------------------------|-------------|-------------|
| C                                            | 1.12277447               | -1.34254734 | -0.78588200 |
| O                                            | 2.24485147               | -1.48077434 | -1.19332400 |
| Sum of electronic and zero-point Energies=   |                          |             | -813.746464 |
| Sum of electronic and thermal Energies=      |                          |             | -813.734040 |
| Sum of electronic and thermal Enthalpies=    |                          |             | -813.733096 |
| Sum of electronic and thermal Free Energies= |                          |             | -813.787930 |
| Imaginary frequency:                         | -313.03 cm <sup>-1</sup> |             |             |

### TS11a

|                                              |                          |             |             |
|----------------------------------------------|--------------------------|-------------|-------------|
| C                                            | 0.08902077               | 0.01483680  | 0.00000000  |
| C                                            | 0.14468777               | 1.56265080  | 0.07994000  |
| H                                            | 0.79338977               | -0.44708020 | 0.69803800  |
| H                                            | 0.48649677               | 1.95598280  | 1.04540400  |
| C                                            | 1.03136877               | 1.99049880  | -1.05894600 |
| C                                            | 0.52310377               | -0.30925720 | -1.45912900 |
| H                                            | 1.13288777               | -1.21567920 | -1.53117600 |
| C                                            | 1.25952677               | 0.92749780  | -1.91742100 |
| H                                            | -0.35055723              | -0.46821120 | -2.11055700 |
| H                                            | 1.15474477               | 3.03241780  | -1.32627300 |
| C                                            | -1.37115423              | -0.36525520 | 0.34724000  |
| C                                            | -2.22821123              | 0.79785280  | -0.18020200 |
| H                                            | -1.65860223              | -1.33415220 | -0.07370400 |
| H                                            | -1.48072823              | -0.44246020 | 1.43554700  |
| H                                            | 1.60961677               | 1.04816780  | -2.93579100 |
| H                                            | -3.15812123              | 0.97257080  | 0.36901000  |
| H                                            | -2.50706623              | 0.65333980  | -1.23403600 |
| O                                            | 2.86088777               | 2.26507180  | 0.05420700  |
| O                                            | 3.24887177               | 0.24474380  | -1.50010100 |
| Os                                           | 4.14645377               | 1.11403180  | -0.26617100 |
| O                                            | 5.52908577               | 1.88797080  | -0.92355600 |
| O                                            | 4.42761777               | 0.11680780  | 1.10294900  |
| C                                            | -1.32193723              | 2.03095880  | -0.11946000 |
| O                                            | -1.67119823              | 3.18413280  | -0.21981100 |
| Sum of electronic and zero-point Energies=   |                          |             | -777.802374 |
| Sum of electronic and thermal Energies=      |                          |             | -777.789579 |
| Sum of electronic and thermal Enthalpies=    |                          |             | -777.788635 |
| Sum of electronic and thermal Free Energies= |                          |             | -777.843762 |
| Imaginary frequency:                         | -258.65 cm <sup>-1</sup> |             |             |

### TS13a

|   |            |             |            |
|---|------------|-------------|------------|
| C | 0.45994063 | -0.08902077 | 0.00000000 |
|---|------------|-------------|------------|



|                                               |             |             |             |
|-----------------------------------------------|-------------|-------------|-------------|
| C                                             | 1.49561263  | -2.15254877 | 0.75726400  |
| C                                             | 1.66088063  | -1.22460877 | 1.77203700  |
| C                                             | 0.87981563  | 0.03651523  | 1.49122400  |
| C                                             | 0.57772563  | -1.60728277 | -0.30765200 |
| H                                             | 1.13465863  | 0.49094923  | -0.63485000 |
| H                                             | 1.99268363  | -1.48385877 | 2.77004200  |
| H                                             | 1.45555063  | 0.94467323  | 1.69591800  |
| H                                             | 0.89509963  | -1.84803877 | -1.32554300 |
| O                                             | 3.24337463  | -2.06673077 | -0.45000600 |
| O                                             | 3.63362463  | -0.45803477 | 1.52403600  |
| Os                                            | 4.52578363  | -1.00546777 | 0.11297200  |
| O                                             | 4.77971163  | 0.28757723  | -0.98547600 |
| O                                             | 5.92307763  | -1.89101677 | 0.56114400  |
| H                                             | -0.00021737 | 0.06462123  | 2.15095300  |
| H                                             | 1.68037063  | -3.21427777 | 0.86167100  |
| C                                             | -1.69900037 | -1.15576277 | -0.09725800 |
| O                                             | -2.86952337 | -1.38816077 | 0.04180800  |
| C                                             | -1.01483037 | 0.19799123  | -0.28452600 |
| H                                             | -1.47349237 | 0.94722023  | 0.36539200  |
| H                                             | -1.17927537 | 0.51856123  | -1.32084300 |
| O                                             | -0.75552637 | -2.14776977 | -0.12317000 |
| Sum of electronic and zero-point Energies=    |             |             | -813.747277 |
| Sum of electronic and thermal Energies=       |             |             | -813.734918 |
| Sum of electronic and thermal Enthalpies=     |             |             | -813.733974 |
| Sum of electronic and thermal Free Energies=  |             |             | -813.788270 |
| Imaginary frequency: -277.80 cm <sup>-1</sup> |             |             |             |

### C. Literature Search

Searches in SciFinder were performed on 8/25/2011. Structure searches are summarized in Table S1, reaction searches in Table S2. The hits were screened manually to remove duplicates and extract the 24 relevant examples. A control search (Table S3), in which the bridgehead hydrogens were omitted, revealed another 2 relevant examples not found in the previous searches.

**Table S1:** SciFinder substructure searches. Bold bonds indicate the “lock ring fusion tool”, squares around atoms indicate the “lock atoms tool”.

| Entry | Search pattern                                                                      | Hits | Relevant hits |
|-------|-------------------------------------------------------------------------------------|------|---------------|
| 1     | 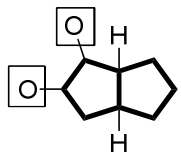   | 44   | 13            |
| 2     |    | 16   | 1             |
| 3     |    | 34   | 6             |
| 4     |   | 23   | 2             |
| 5     |  | 2    | 0             |
| 6     |  | 6    | 0             |
| 7     |  | 0    | 0             |

**Table S2:** SciFinder reaction (substructure) searches. Bold bonds indicate the “lock ring fusion tool”.

| Entry | Search pattern                                                                      | Hits | Relevant hits not covered in Table S1 |
|-------|-------------------------------------------------------------------------------------|------|---------------------------------------|
| 1     | 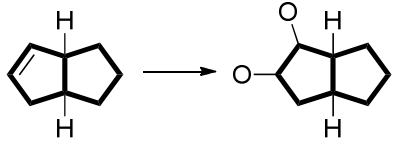   | 22   | 2                                     |
| 2     |    | 9    | 0                                     |
| 3     |    | 0    | 0                                     |
| 4     |  | 13   | 0                                     |

**Table S3:** SciFinder control substructure searches. Bold bonds indicate the “lock ring fusion tool”, squares around atoms indicate the “lock atoms tool”.

| Entry | Search pattern                                                                      | Hits | Relevant hits not covered in Tables S1 or S2 |
|-------|-------------------------------------------------------------------------------------|------|----------------------------------------------|
| 1     | 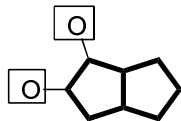   | 45   | 0                                            |
| 2     |    | 16   | 0                                            |
| 3     |    | 36   | 0                                            |
| 4     |  | 28   | 2                                            |

The 26 relevant examples are given in Table S4. Entries 1–6 signify cases where dihydroxylation occurred from the concave face or both faces, and good evidence for the structural assignment is given. In entries 7–12, diastereomeric mixtures are reported without evidence for the assignment, or the products were not assigned. The dihydroxylation product of Entry 13 is assigned by NOE analysis of a later synthetic intermediate. For Entries 14–26, no evidence is given for the assignment. One of the examples (Entry 24) was refuted by a later publication (Entry 6), where an X-ray crystal structure of the product was obtained. Entries 2, 3, 6, 21–23, and 24 were investigated by computational studies and are discussed in the main text.

**Table S4:** Relevant literature examples from the SciFinder literature searches (Tables S1–S3).

| Entr y | Reaction(s) | Comment                                                                                                                                                                         | Referenc e |
|--------|-------------|---------------------------------------------------------------------------------------------------------------------------------------------------------------------------------|------------|
| 1      |             | Assignment based on coupling constants.                                                                                                                                         | 6          |
| 2      |             | "... the carbonyl group may be directing the reaction." Assignment based on NOE.                                                                                                | 7          |
| 3      |             | "... may be a directing effect from the carbonyl group." Strong solvent effect observed. Assignment based on coupling constants, chemical correlation, and a crystal structure. | 8          |
| 4      |             | Chemical evidence for assignment.                                                                                                                                               | 9          |
| 5      |             | Crystallographic evidence and chemical correlation.                                                                                                                             | 10         |

| Entry | Reaction(s) | Comment                                                           | Reference |
|-------|-------------|-------------------------------------------------------------------|-----------|
| 6     |             | Crystal structure.                                                | 11        |
| 7     |             | Unassigned 3:1 mixture.                                           | 12        |
| 8     |             | Unassigned 1:5:5:1 mixture.                                       | 13        |
| 9     |             | Unspecified mixture.                                              | 14        |
| 10    |             | Not assigned.                                                     | 15        |
| 11    |             | No direct evidence for assignment reported.                       | 16        |
| 12    |             | 5.5:1 <i>exo:endo</i> reported, no evidence for assignment given. | 17        |
| 13    |             | NOE assignment of a later intermediate.                           | 18        |
| 14    |             | No evidence for assignment reported.                              | 19        |

| Entry | Reaction(s) | Comment                                                                                                                           | Reference |
|-------|-------------|-----------------------------------------------------------------------------------------------------------------------------------|-----------|
| 15    |             | No evidence for assignment reported.                                                                                              | 20        |
| 16    |             | No evidence for assignment reported.                                                                                              | 21        |
| 17    |             | No evidence for assignment reported.                                                                                              | 22        |
| 18    |             | No evidence for assignment reported.                                                                                              | 23        |
| 19    |             | No evidence for assignment reported.                                                                                              | 24        |
| 20    |             | Discussion of the preferred conformation of the product (through coupling constants). No direct evidence for assignment reported. | 25        |
| 21    |             | No evidence for assignment reported.                                                                                              | 26        |
| 22    |             | No evidence for assignment reported.                                                                                              | 27        |
| 23    |             | No evidence for assignment reported.                                                                                              | 28        |

| Entry | Reaction(s) | Comment                                                  | Reference |
|-------|-------------|----------------------------------------------------------|-----------|
| 24    |             | No evidence for assignment reported. Refuted by Entry 6. | 29        |
| 25    |             | No evidence for assignment reported.                     | 30        |
| 26    |             | No evidence for assignment reported.                     | 31        |

## References

- [1] Fariña, F.; Martín, M. R.; Martín, M. V. *An. Quim.* **1979**, *75*, 144–149.
- [2] Feringa, B. L.; Lange, B. D. *Tetrahedron* **1988**, *44*, 7213–7222.
- [3] De March, P.; Font, J.; Gracia, A.; Qingying, Z. *J. Org. Chem.* **1995**, *60*, 1814–1822.
- [4] Rout, L.; Harned, A. M. *Chem. Eur. J.* **2009**, *15*, 12926–12928.
- [5] The thermal ellipsoid plot is shown at the 50% probability level.
- [6] Clive, D. L. J.; Magnuson, S. R.; Manning, H. W.; Mayhew, D. L. *J. Org. Chem.* **1996**, *61*, 2095–2108.
- [7] Leonard, J.; Hussain, N. *J. Chem. Soc. Perkin Trans. 1* **1994**, 49–60.
- [8] Broom, N.; O'Hanlon, P. J.; Simpson, T. J.; Stephen, R.; Willis, C. L. *J. Chem. Soc. Perkin Trans. 1* **1995**, 3067–3072.



- [9] Kon, J.; Isoe, S. *Tetrahedron Lett.* **1980**, *21*, 3399–3402.
- [10] (a) Boschelli, D.; Smith, A. B., III *Tetrahedron Lett.* **1981**, *22*, 3733–3736. (b) Smith, A. B., III; Boschelli, D. *J. Org. Chem.* **1983**, *48*, 1217–1226.
- [11] Freimanis, J.; Gerca, L.; Turovskis, I.; Liepinš, E.; Lola, D.; Mishnev, A.; Bundule, M.; Bleidelis, J. *J. Prakt. Chem.* **1987**, *329*, 39–48.
- [12] Ritterskamp, P.; Demuth, M.; Schaffner, K. *J. Org. Chem.* **1984**, *49*, 1155–1158.
- [13] Stolle, A.; Antonicek, H.-P.; Lensky, S.; Voerste, A.; Müller, T.; Baumgarten, J.; von dem Bruch, K.; Müller, G.; Stropp, U.; Horváth, E.; de Vry, J.-M.-V.; Schreiber, R. *PCT Int. Appl.* **1999**, WO 9936417.
- [14] (a) Nelson, N. A.; Jackson, R. W. *Tetrahedron Lett.* **1976**, *37*, 3275–3278. (b) Nelson, N. A.; Scahill, T. A. *J. Org. Chem.* **1979**, *44*, 2790–2793. (c) Nelson, N. A.; Galesburg, M. *U. S. Patent* **1977**, US 4048194. (d) Kelly, R. C.; Nelson, N. A. *U. S. Patent* **1977**, US 4020173. (e) Schneider, W. P. *U. S. Patent* **1977**, US 4018804.
- [15] Kan, T.; Kawamoto, Y.; Asakawa, T.; Furuta, T.; Fukuyama, T. *Org. Lett.* **2008**, *10*, 169–171.
- [16] Johansen, S. K.; Lundt, I. *J. Chem. Soc. Perkin Trans. 1* **1999**, 3615–3622.
- [17] (a) Whitesell, J. K.; Matthews, R. S. *J. Org. Chem.* **1977**, *42*, 3878–3882. (b) Whitesell, J. K.; Wang, P. K. S.; Aguilar, D. A. *J. Org. Chem.* **1983**, *48*, 2511–2515.
- [18] Bøjstrup, M.; Fanefjord, M.; Lundt, I. *Org. Biomol. Chem.* **2007**, *5*, 3164–3171.

- [19] Leonard, J.; Hewitt, J. D.; Ouali, D.; Bennett, L. R.; Mahmood, A.; Simpson, S. J. *Tetrahedron* **2002**, *58*, 4681–4691.
- [20] Parkes, K. E. B.; Pattenden, G. *J. Chem. Soc. Perkin Trans. 1* **1988**, 1119–1134.
- [21] Kojima, K.; Koyama, K.; Amemiya, S.; Saito, S. *Chem. Pharm. Bull.* **1987**, *35*, 948–956.
- [22] Kon, K.; Isoe, S. *Helv. Chim. Acta* **1983**, *66*, 755–756.
- [23] Furuichi, K., Miwa, T. *Tetrahedron Lett.* **1974**, *42*, 3689–3692.
- [24] (a) Brewster, D.; Myers, M.; Ormerod, J.; Spinner, M. E.; Turner, S.; Smith, A. C. B. *J. Chem. Soc. Chem. Commun.* **1972**, 1235–1236. (b) Brewster, D., Myers, M.; Ormerod, J.; Otter, P.; Smith, A. C. B.; Spinner, M. E.; Turner, S. *J. Chem. Soc. Perkin Trans. 1* **1973**, 2796–2804. (c) Turner, S. *Ger. Offen.* **1973**, DE 2246867. (d) Turner, S. *Ger. Offen.* **1974**, DE 2264367.
- [25] Ghera, E. *J. Org. Chem.* **1968**, *33*, 1042–1051.
- [26] Neufellner, E.; Kapeller, H.; Griengl, H. *Tetrahedron* **1998**, *54*, 11043–11062.
- [27] Ernst, M.; Helmchen, G. *Angew. Chem. Int. Ed.* **2002**, *41*, 4054–4056.
- [28] Marschner, C.; Baumgartner, J.; Griengl, H. *J. Org. Chem.* **1995**, *60*, 5224–5235.
- [29] Gruber, L.; Tömösközi, I., Major, E., Kovács, G. *Tetrahedron Lett.* **1974**, *42*, 3729–3730.
- [30] Hussain, N.; Leonard, J. *Tetrahedron Lett.* **1987**, *28*, 4871–4874.
- [31] Whitesell, J. K.; Matthews, R. S.; Minton, M. A.; Helbling, A. M. *J. Am. Chem. Soc.* **1981**, *103*, 3468–3472.
